# Supplementary material for: Assessing C reactive protein/albumin ratio as a new biomarker for polycystic ovary syndrome: a case–control study of women from Bahraini medical clinics
Source: PubMed Central journal article supplement — BMJ Open. 2018 Oct 27;8(10):e021860. doi: 10.1136/bmjopen-2018-021860 (PMC6224721; doi:10.1136/bmjopen-2018-021860), 2018-10-27
Supplement: bmjopen-2018-021860.draft_revisions.pdf [file bmjopen-2018-021860.draft_revisions.pdf]

# BMJ Open

BMJ Open is committed to open peer review. As part of this commitment we make the peer review history of every article we publish publicly available.

When an article is published we post the peer reviewers' comments and the authors' responses online. We also post the versions of the paper that were used during peer review. These are the versions that the peer review comments apply to.

The versions of the paper that follow are the versions that were submitted during the peer review process. They are not the versions of record or the final published versions. They should not be cited or distributed as the published version of this manuscript.

BMJ Open is an open access journal and the full, final, typeset and author-corrected version of record of the manuscript is available on our site with no access controls, subscription charges or pay-per-view fees (<http://bmjopen.bmj.com>).

If you have any questions on BMJ Open's open peer review process please email [info.bmjopen@bmj.com](mailto:info.bmjopen@bmj.com)

# BMJ Open

## Assessing C-reactive protein/albumin ratio as a new predictor of Polycystic Ovary Syndrome: a case-control study

|                               |                                                                                                                                                                                                                                                                        |
|-------------------------------|------------------------------------------------------------------------------------------------------------------------------------------------------------------------------------------------------------------------------------------------------------------------|
| Journal:                      | <i>BMJ Open</i>                                                                                                                                                                                                                                                        |
| Manuscript ID                 | bmjopen-2018-021860                                                                                                                                                                                                                                                    |
| Article Type:                 | Research                                                                                                                                                                                                                                                               |
| Date Submitted by the Author: | 22-Jan-2018                                                                                                                                                                                                                                                            |
| Complete List of Authors:     | Kalyan, Shirin; University of British Columbia, Medicine;<br>Goshtasebi, Azita; University of British Columbia, Medicine<br>Sarray, Sameh; Arabian Gulf University<br>Joannou, Angela; University of British Columbia, Medicine<br>Almawi, Wassim; El-Manar University |
| Keywords:                     | polycystic ovary syndrome, inflammation, C-reactive protein, albumin, pathophysiology                                                                                                                                                                                  |
|                               |                                                                                                                                                                                                                                                                        |

SCHOLARONE™  
Manuscripts

View Only

1  
2  
3 **1 Assessing C-reactive protein/albumin ratio as a new predictor of Polycystic Ovary**  
4  
5 **2 Syndrome: a case-control study**  
6

7  
8  
9 Short title: CRP/Albumin as a predictor of PCOS  
10

11  
12 Shirin Kalyan <sup>1\*</sup>, Azita Goshtesabi <sup>1</sup>, Sameh Sarray <sup>2,3</sup>, Angela Joannou <sup>1</sup>, Wassim Almawi <sup>3</sup>  
13  
14

15  
16 <sup>1</sup>CeMCOR, Division of Endocrinology, Department of Medicine, University of British  
17 Columbia, Vancouver, BC, Canada  
18

19  
20 <sup>2</sup>Arabian Gulf University, Department of Medical Biochemistry, Manama Bahrain  
21

22  
23 <sup>3</sup>Faculty of Sciences, El-Manar University, Tunis, Tunisia.  
24  
25

26  
27 \*Corresponding author:  
28

29  
30 Dr. Shirin Kalyan  
31

32  
33 Rm 4139, Diamond Health Care Centre  
34

35  
36 Division of Endocrinology  
37

38  
39 Department of Medicine  
40

41  
42 University of British Columbia  
43

44  
45 Email: [shirin.kalyan@ubc.ca](mailto:shirin.kalyan@ubc.ca)  
46  
47

48  
49  
50  
51  
52  
53  
54  
55  
56  
57  
58  
59  
60  
31  
32  
33  
34  
Keywords: polycystic ovary syndrome, inflammation, pathophysiology, C-reactive protein, albumin

Word count: 2409 (main article)

1  
2  
3 35  
4 36 **Abstract**

5  
6 37 *Objective:* Polycystic ovary syndrome (PCOS) is an endocrine disorder affecting  
7  
8 38 approximately one in seven women who experience androgen excess, menstrual cycle  
9  
10 39 irregularities, frequent anovulation, and a tendency for central obesity and insulin resistance.  
11  
12 40 Chronic subclinical inflammation is now recognized as being common in the context of  
13  
14 41 PCOS, which led to the postulation that PCOS may fundamentally be an inflammatory  
15  
16 42 process. This study aimed to: 1) evaluate serum CRP/albumin ratio as a predictor of PCOS;  
17  
18 43 2) compare the relationship between CRP/albumin and PCOS to classical predictors of the  
19  
20 44 syndrome.

21  
22  
23 45 *Design:* Case-control study.

24  
25 46 *Setting:* Adult obstetrics/gynaecology, endocrinology and outpatient clinics; university  
26  
27 47 hospital in Bahrain.

28  
29 48 *Participants:* 200 premenopausal women with a diagnosis of PCOS, and 119 ethnically-  
30  
31 49 matched eumenorrheic premenopausal women.

32  
33 50 *Main Outcome Measures:* CRP/albumin ratio, anthropometric measures, insulin resistance,  
34  
35 51 androgen excess.

36  
37 52 *Results:* Independent of body mass index (BMI), receiver operating characteristic (ROC)  
38  
39 53 curve for CRP/albumin ratio as predictor of PCOS was 0.865 (95% CI: 0.824–0.905), which  
40  
41 54 was more sensitive than CRP alone. Binary regression analysis showed that CRP/albumin  
42  
43 55 ratio outperformed classical markers, free androgen index and insulin resistance, in predicting  
44  
45 56 PCOS for every BMI category.

46  
47 57 *Conclusion:* CRP/albumin ratio, a marker for inflammation related to metabolic dysfunction,  
48  
49 58 better predicts PCOS than either androgen excess or insulin resistance. Inflammation is  
50  
51 59 known to be influenced by adiposity, but relative to controls, women with PCOS have higher  
52  
53  
54  
55  
56  
57  
58  
59

1  
2  
3 60 levels of CRP/albumin irrespective of BMI. These findings support the view that  
4  
5 61 inflammation plays a central role in the pathophysiology of PCOS.  
6  
7 62  
8  
9 63  
10

11 64 **Article Summary**

12  
13 65 *Strengths and limitations of this study*

- 14  
15  
16 66 • This analysis addressed previous limitations of studies, namely small sample sizes,  
17  
18 67 heterogeneous populations, and confounding factors (such as BMI), that have  
19  
20 68 attempted to show PCOS is an inflammatory process  
21  
22 69 • The relationship between inflammation and PCOS was assessed using CRP/albumin  
23  
24 70 ratio, which may be a better marker for inflammation in the context of metabolic  
25  
26 71 dysfunction  
27  
28  
29 72 • Limitation: study used waist circumference as a substitute for visceral adiposity; gold  
30  
31 73 standard is computed tomography (CT) or magnetic resonance imaging (MRI)  
32

33 74  
34  
35  
36  
37  
38  
39  
40  
41  
42  
43  
44  
45  
46  
47  
48  
49  
50  
51  
52  
53  
54  
55  
56  
57  
58  
59  
60

## 75 Introduction

76 Polycystic ovary syndrome (PCOS) is the most common reproductive disorder, affecting 5 to  
77 15 % of premenopausal women worldwide<sup>1,2</sup>. The prevalence of PCOS is increasing<sup>1</sup>,  
78 which may partly be attributed to improved diagnosis, as well as an increase in environmental  
79 factors that may predispose to the development of this complex metabolic condition. PCOS is  
80 characterized by androgen excess, menstrual irregularities, ovulatory disturbances, and is  
81 often associated with central obesity and insulin resistance<sup>3-5</sup>. As such, women with PCOS  
82 are at an increased risk for a number of health issues, including infertility, cardiovascular  
83 disease and diabetes<sup>3,6,7</sup>.

84 Possibly related to the constellation of endocrine and metabolic dysfunction they experience,  
85 women with PCOS are also found to have greater chronic subclinical inflammation<sup>8-11</sup>,  
86 which is often clinically assessed by measuring serum levels of C-reactive protein (CRP).  
87 CRP is a liver-derived acute phase protein produced in response to IL-6 secreted from  
88 activated cells such as macrophages and adipocytes<sup>12,13</sup>. A meta-analysis of 31 studies  
89 concluded that systemic CRP levels are 96% higher in women with PCOS compared to  
90 control women<sup>14</sup>. Collectively, these findings have given rise to the speculation that  
91 inflammation may play a pivotal role in the pathophysiology of PCOS<sup>8-10</sup>.

92 Elevated serum CRP levels are linked to several health risk factors experienced by women  
93 with PCOS, particularly insulin resistance and heightened risk of type 2 diabetes<sup>7,15,16</sup>.

94 Chronic inflammation also contributes to endothelial dysfunction, exacerbating the  
95 development of atherosclerotic plaques, triggering the onset of cardiovascular disease (CVD)  
96<sup>17</sup>. As such inflammation has been associated with both CVD and coronary artery disease in  
97 women with PCOS<sup>10</sup>.

1  
2  
3 98 In contrast to CRP, albumin is a negative acute phase response protein produced by the liver.  
4  
5 99 Serum levels of albumin are reduced in individuals experiencing chronic inflammation<sup>18</sup>. In  
6  
7 100 addition to its role as a binding molecule for sex steroids<sup>19</sup>, albumin also provides the  
8  
9 101 majority of the total antioxidant capacity of normal plasma<sup>18</sup>. The ratio of serum CRP levels  
10  
11 102 over serum albumin (CRP/albumin) was found to be strongly associated with more severe  
12  
13 103 metabolic dysfunction in premenopausal women with induced alterations to their ovarian  
14  
15 104 hormone status<sup>20</sup>. CRP/albumin ratio was also found to be significantly higher in  
16  
17 105 premenopausal women with PCOS relative to controls, and adversely predicted their bone  
18  
19 106 quality<sup>21</sup>. Given the ability of CRP/albumin to simultaneously capture chronic inflammation  
20  
21 107 and metabolic dysfunction in premenopausal women, we hypothesized that CRP/albumin  
22  
23 108 ratio would, in itself, serve as a strong predictor of PCOS in a cohort of similarly aged  
24  
25 109 women. This case-control study investigated CRP/albumin ratio along with classical markers,  
26  
27 110 androgen excess and insulin resistance, in their ability to predict PCOS in 319 premenopausal  
28  
29 111 Bahraini Arab women.  
30  
31  
32

33 112

34  
35 113 **Methods**36  
37 114 *Study subjects*

38  
39 115 Women with PCOS (n = 200) were recruited from adult obstetrics/gynecology,  
40  
41 116 endocrinology and outpatient clinics in Manama, Bahrain. Women without PCOS (n = 119)  
42  
43 117 were ethnically-matched, eumenorrheic university employees and students, and healthy  
44  
45 118 volunteers representative of the Bahraini population. Women serving as controls were  
46  
47 119 examined in the follicular phase of their menstrual cycle, and had their testosterone levels  
48  
49 120 were within range. A diagnosis of PCOS was based on the 2003 Rotterdam Criteria, which  
50  
51 121 requires two of the three following criteria to be met: ultrasound evidence of polycystic  
52  
53 122 ovarian morphology, anovulation, and hyperandrogenism<sup>22</sup>. Exclusion criteria included  
54  
55  
56  
57  
58  
59  
60

1  
2  
3 123 hyperprolactinemia, non-classical adrenal hyperplasia, androgen-producing tumors, 21-  
4  
5 124 hydroxylase deficiency, Cushing's syndrome, and active thyroid disease. Additional  
6  
7 125 exclusion criteria included extremes of body mass index (BMI;  $<18 \text{ kg/m}^2$  or  $>45 \text{ kg/m}^2$ ),  
8  
9 126 recent/present illness, and treatment affecting carbohydrate metabolism or hormonal levels,  
10  
11 127 for three months or longer before inclusion the study. Women using anti-hypertensive, oral  
12  
13 128 contraceptive, anti-inflammatory, and lipid-lowering drugs were also excluded. Demographic  
14  
15 129 information, along with detailed personal and family history of diabetes, hypertension,  
16  
17 130 infertility, hypercholesterolemia, and ischemic heart disease were obtained from all  
18  
19 131 participants. This study was conducted in accord with the Helsinki II Declaration guidelines,  
20  
21 132 and all participants gave written informed consent to participate. Study approval was  
22  
23 133 obtained from the Bahraini Ministry of Health and Arabian Gulf University Research and  
24  
25 134 Ethics Committees (IRB number: 35-PI-01/15) and the Clinical Research Ethics Board of the  
26  
27 135 University of British Columbia (H16-02101).  
28  
29  
30

31 136

### 32 33 137 *Biochemical analysis*

34  
35 138 Peripheral venous fasting blood samples were obtained between 7:00 and 9:00 am following  
36  
37 139 an overnight ( $> 12 \text{ h}$ ) fast during the early follicular phase of the menstrual cycle (days  $2 \pm 5$ )  
38  
39 140 for control women, or women with PCOS who did not present with menstrual irregularities,  
40  
41 141 or any day for women with PCOS with menstrual irregularities. Serum samples were  
42  
43 142 analyzed for sex hormone binding globulin (SHBG) by sandwich ELISA (R&D Systems,  
44  
45 143 Minneapolis, MN); assay sensitivity was  $0.01 \text{ nmol/ml}$ , and inter-assay and intra-assay  
46  
47 144 precision (CV %) were 5.3% and 4.3%, respectively.  
48  
49  
50

51 145 Serum luteinizing hormone (LH), follicular stimulating hormone (FSH), thyroid stimulating  
52  
53 146 hormone (TSH), testosterone, glucose (ADVIA Centaur, Bayer Vital, Fernwald, Germany),  
54  
55 147 and insulin (IMMULITE 2000, DPC Biermann, Bad Nauheim, Germany), were measured by  
56  
57  
58  
59  
60



1  
2  
3 148 automated chemiluminescence immunoassays. Free (FT) and bioactive (BT) testosterone and  
4  
5 149 free androgen index (FAI) were determined using Free & Bioavailable Testosterone  
6  
7 150 Calculator ([www.issam.ch/freetesto.htm](http://www.issam.ch/freetesto.htm)). Concentrations of serum albumin were analyzed  
8  
9 151 by photospectrometry with albumin bromocresol purple assay on a COBAS c701 Chemistry  
10  
11 152 Analyzer (Roche Diagnostics, Dubai, UAE). Insulin resistance (IR) was estimated by the  
12  
13 153 homeostasis model assessment (HOMA-IR), defined as fasting serum insulin (IU/mL) ×  
14  
15 154 fasting plasma glucose (mmol/L)/22.5.

16  
17  
18 155 Measurement of plasma high sensitivity CRP levels was done by latex-enhanced  
19  
20 156 nephelometry on a BN II Nephelometer (Dade Behring, Milan, Italy). Samples were assayed  
21  
22 157 in duplicate in each analytical run; the lower limit of detection was 0.15 mg/L, and the assay  
23  
24 158 range was 0.175–11.0 mg/L (initial dilution). Serial serum dilutions were made in measuring  
25  
26 159 high CRP (>30 mg/L) levels. Percentile CRP values were estimated for comparison  
27  
28  
29 160 purposes.

### 31 32 161 *Statistical analysis*

33  
34 162 The *core outcome set* of variables included assessment of CRP/albumin as a predictor of  
35  
36 163 PCOS while controlling for relevant factors, such as BMI and age, and to subsequently  
37  
38 164 compare the strength of the relationship between CRP/albumin and PCOS with classical  
39  
40 165 predictors of the syndrome, androgen excess and insulin resistance. Baseline characteristics  
41  
42 166 were compared using the Mann-Whitney U test and the independent samples t-test for the  
43  
44 167 continuous variables, and the  $\chi^2$  test for categorical variables. Numerical variables are  
45  
46 168 presented as mean ± standard deviation (SD). Because distribution of CRP/albumin levels  
47  
48 169 was skewed to the right, correlations between CRP/albumin ratio and other continuous  
49  
50 170 variables were assessed using Spearman's rho. Univariate general linear models were applied  
51  
52 171 to test independent associations between CRP/albumin ratio and other independent variables.  
53  
54  
55  
56  
57  
58  
59  
60

1  
2  
3 172 The optimal cut-off level for the CRP/albumin ratio was determined by a receiver operating  
4  
5 173 characteristic (ROC) curve analysis, and the areas under the curve (AUC) were measured and  
6  
7 174 compared to assess the power of a model to identify patients who experienced metabolic  
8  
9 175 disturbances. Cut-off values showing the greatest accuracy were determined using a  
10  
11 176 sensitivity/specificity versus criterion value plot. Quartiles of CRP and CRP/albumin ratio  
12  
13 177 were calculated separately in PCOS and control groups; and since 25% quartile of CRP value  
14  
15 178 in patient group was very close to standard value of normal level of CRP, we decided to use  
16  
17 179 25 quartile values for CRP and CRP/albumin ratio in PCOS group as cut-off values for the  
18  
19 180 two predictors respectively.

20  
21  
22  
23 181 Using the calculated cut-off values, regression analysis was performed to determine how well  
24  
25 182 each variable predicted PCOS. To fully explore the role of the CRP/albumin ratio as a  
26  
27 183 biomarker in the prediction of metabolic disturbances, CRP and CRP/albumin ratio were  
28  
29 184 additionally assessed as binary variables. Subjects were categorized into two groups based on  
30  
31 185 the cut-off values and their means (SD) for metabolic markers. Insulin resistance (HOMA-  
32  
33 186 IR), free testosterone, total adiponectin, BMI and TSH were compared between subjects with  
34  
35 187 normal values, and those who had higher than normal values. P-values <0.05 were considered  
36  
37 188 as statistically significant. All statistical analyses were performed using the IBM SPSS  
38  
39 189 statistics software program version 22 (IBM, Armonk, NY).

40  
41  
42  
43 190

## 44 45 191 **Results**

### 46 47 192 *Study subjects*

48  
49 193 The sociodemographic, anthropometric, clinical, and biochemical characteristics of the 200  
50  
51 194 women with PCOS and 119 controls women are summarized in **Table 1**. Relative to controls,  
52  
53 195 women with PCOS had fewer pregnancies and live births ( $p<0.001$ ), were more likely to

196 have insulin resistance ( $p<0.001$ ), and differed in education attainment with those with  
 197 PCOS, having a higher number of high school and post-secondary graduates ( $p=0.012$ ).

198 *Metabolic characteristics*

199 The proportion of women with a BMI greater than  $30 \text{ kg/m}^2$  were higher in the PCOS cohort  
 200 than controls ( $p<0.001$ ), but the waist-to-hip ratio was not significantly different (**Table 1**).

201 Serum levels of adiponectin, an adipocyte-associated protein that tends to be inversely linked  
 202 to visceral adiposity<sup>23</sup>, was markedly lower in women with PCOS compared to controls.

203 Fasting plasma glucose, cholesterol, HDL, LDL and triglyceride levels did not differ  
 204 significantly between women with and without PCOS. However, indices of insulin resistance  
 205 and insulin sensitivity (HOMA-IR and QUICKI) indicated that women with PCOS had  
 206 greater impaired regulation of insulin compared to controls (**Table 1**).

207 **Table 1: Demographic, clinical and hormonal characteristics of study population:**  
 208 **women with polycystic ovary syndrome (PCOS) and controls.**

209 Data are presented as means (standard deviation).

|                             | All<br>(N=319) | PCOS<br>(N=200) | Controls<br>(N=119) | Mean<br>difference | 95 % CI of Mean<br>Difference |       |
|-----------------------------|----------------|-----------------|---------------------|--------------------|-------------------------------|-------|
|                             |                |                 |                     |                    | lower                         | upper |
| Age (yrs)                   | 27.9 (6.4)     | 28.4 (5.9)      | 27.2 (7.2)          | 1.24               | -0.22                         | 2.71  |
| BMI ( $\text{kg/m}^2$ )     | 28 (5.9)       | 29 (6.3)        | 26.5 (5)            | 2.53               | 1.19                          | 3.87  |
| Waist/hip ratio             | 0.94 (0.09)    | 0.94 (0.09)     | 0.93 (0.09)         | 0.0067             | -0.017                        | 0.031 |
| Menarche (yrs)              | 12.5 (1.4)     | 12.5 (1.5)      | 12.4 (1.2)          | 0.12               | -0.21                         | 0.45  |
| HOMA-IR                     | 3.2 (0.18)     | 3.8 (0.26)      | 2.1 (0.2)           | 1.67               | 0.94                          | 2.4   |
| QUICKI                      | 0.6 (0.006)    | 0.57 (0.008)    | 0.65 (.01)          | -0.078             | -0.10                         | -0.05 |
| Total adiponectin<br>(ng/L) | 33.8 (1.4)     | 28.4 (1.3)      | 44.6 (2.9)          | -16.25             | -21                           | -10   |

|                         |               |               |               |        |        |        |
|-------------------------|---------------|---------------|---------------|--------|--------|--------|
| Albumin (g/L)           | 37.3 (0.46)   | 32.7 (0.46)   | 45 (0.35)     | -12.22 | -13.52 | -10.93 |
| CRP (mg/L)              | 11.1 (1.1)    | 15.5 (1.6)    | 3.6 (0.85)    | 11.89  | 7.61   | 16.17  |
| CRP/Alb ratio           | 0.36 (0.04)   | 0.53 (0.06)   | 0.08 (0.02)   | 0.45   | 0.29   | 0.61   |
| SHBG (nmol/L)           | 60.1 (1.5)    | 52.2 (1.4)    | 72 (2.8)      | -19.72 | -26.5  | -13.93 |
| Free testosterone index | 0.025 (0.001) | 0.029 (0.001) | 0.017 (0.001) | 0.011  | 0.007  | 0.015  |

210

211 BMI: Body Mass Index, HOMA.IR: Homeostatic Model Assessment for Insulin Resistance,

212 QUICKI: Quantitative insulin sensitivity check index, CRP: C-reactive protein, SHBG: Sex

213 hormone binding hormone.

214 *Reproductive hormone characteristics*

215 There were no statistically significant differences in plasma levels of estradiol, progesterone,

216 total testosterone, prolactin, FSH, LH and DHES between women with and without PCOS.

217 Free testosterone was higher and SHBG lower in women with PCOS (**Table 1**).218 *C-reactive protein (CRP)/albumin ratio as a predictor of polycystic ovary syndrome (PCOS)*219 *stratified by body mass index (BMI)*

220 Women with PCOS had markedly higher levels of CRP and lower levels of serum albumin

221 relative to controls ( $p < 0.001$ ; **Table 1**). ROC curve analysis showed that the CRP/albumin

222 ratio had greater discriminatory power to differentiate between women with PCOS and

223 controls (AUC: 0.865, 95% CI: 0.824-0.905) compared to CRP alone (AUC: 0.820, 95% CI:

224 0.773-0.867); **Figure 1**. This greater efficacy of CRP/albumin ratio to discriminate between

225 cases and controls was also evident when taking into account the presence of insulin

226 resistance at every measure of sensitivity; for a sensitivity level of 75%, CRP/albumin ratio

227 had a specificity of 85% compared to 69% for CRP alone.

228 Spearman correlation analysis between CRP/albumin ratios and clinical and biochemical  
 229 markers was subsequently performed. Variables found to be univariately linked to  
 230 CRP/albumin values were included in a general linear model testing the relationship amongst  
 231 PCOS diagnosis, BMI, and CRP/albumin levels. The model revealed that for any given BMI  
 232 value, women with PCOS have markedly elevated CRP/albumin levels ( $p < 0.001$ , **Figure 2**).

233 Classical predictors of PCOS, free androgen index and insulin resistance, were compared to  
 234 CRP/albumin ratio as predictors of PCOS in a binary regression analysis stratified by three  
 235 BMI categories:  $< 25 \text{ kg/m}^2$  [normal],  $25 - 29.9 \text{ kg/m}^2$  [overweight],  $> 30 \text{ kg/m}^2$  [obese];  
 236 **Table 2.** A CRP/albumin ratio of  $\geq 0.097$  outperformed both insulin resistance and free  
 237 androgen index in predicting PCOS for every BMI category (**Table 2**).

238

239 **Table 2: Summary of binary Regression Analysis for Variables Predicting PCOS with**  
 240 **the Odds Ratio of each risk factor adjusted for other variables in the model**

241

|                                  | Odds Ratio (95% Confidence Interval) |                             |                          |
|----------------------------------|--------------------------------------|-----------------------------|--------------------------|
|                                  | BMI < 25<br>(normal)                 | BMI 25-29.9<br>(overweight) | BMI $\geq$ 30<br>(obese) |
| CRP/Albumin Ratio <sup>1</sup>   |                                      |                             |                          |
| < 0.097                          | 1                                    | 1                           | 1                        |
| $\geq 0.097$                     | 11.21 (3.28-39.75)                   | 19.32 (5.07-72.17)          | 34.5 (7.75-153.52)       |
| Insulin Resistance <sup>2</sup>  |                                      |                             |                          |
| No                               | 1                                    | 1                           | 1                        |
| Borderline                       | 3.34 (0.645-17.33)                   | 5.58 (0.907-34.41)          | 3.13 (0.53-18.48)        |
| Yes                              | 9.21 (1.63-51.93)                    | 8.81 (1.75-44.31)           | 17.94 (1.81-177.61)      |
| Free Androgen Index <sup>3</sup> |                                      |                             |                          |
| <3.95                            | 1                                    | 1                           | 1                        |

|             |                  |                 |                   |
|-------------|------------------|-----------------|-------------------|
| $\geq 3.95$ | 2.28 (.536-9.75) | 0.86 (.22-3.35) | 3.79 (0.59-24.42) |
|-------------|------------------|-----------------|-------------------|

242

243 <sup>1</sup>Cut-off values were derived from the sensitivity and specificity analysis of the receiver

244 operating characteristic curve

245 <sup>2</sup>Categories of insulin resistance based on normal values used for HOMA-IR

246 <sup>3</sup>Cut-off values from normal laboratory reference ranges for free androgen index

247

## 248 Discussion

249 This study demonstrated that CRP/albumin ratio is a better predictor of PCOS than both free  
 250 androgens and insulin resistance in 319 ethnically-matched premenopausal women, and this  
 251 relationship was independent of BMI. Despite being the most common reproductive disorder  
 252 to affect women, the etiology of PCOS has remained elusive to date. In the absence of a  
 253 definitive cure, treatment has focused on symptom management, and a goal to prevent the  
 254 progression of serious health conditions, such as type 2 diabetes and CVD, for which women  
 255 with PCOS are at heightened risk. Chronic low-grade inflammation has emerged as a  
 256 common underlying state in women with PCOS, and a likely direct contributor to insulin  
 257 resistance and heart disease risk. This has raised the question whether PCOS is fundamentally  
 258 an inflammatory condition<sup>8, 10, 24</sup>.

259 Small sample sizes, heterogeneous populations, and an inability to correct for confounding  
 260 factors, such as BMI and use of oral contraceptives, both of which influence inflammatory  
 261 markers such as CRP<sup>21</sup>, has in part hampered efforts in assigning inflammation as truly a  
 262 defining feature of PCOS. This current analysis has overcome some of the main issues in  
 263 assessing the independent relationship between PCOS and chronic low-grade inflammation.  
 264 This was accomplished by accounting for many of the confounding variables and by using a  
 265 more refined marker for inflammation, the CRP/albumin ratio, which may have greater

1  
2  
3 266 specificity and sensitivity for inflammation associated with metabolic dysfunction. The  
4  
5 267 CRP/albumin ratio was first found to be useful in assessing cardiometabolic and  
6  
7 268 inflammatory status following ovariectomy surgery<sup>20</sup>. It was subsequently used to show the  
8  
9 269 influence of chronic subclinical inflammation on bone quality in women with PCOS<sup>21</sup>.  
10  
11 270 Although CRP is used to predict cardiovascular risk and is associated with metabolic  
12  
13 271 disorders associated with obesity and insulin resistance<sup>25-28</sup>, it has been criticized for being  
14  
15 272 too general and non-specific a marker for inflammation<sup>29</sup>.  
16  
17  
18 273 When compared to CRP alone, we found that the CRP/albumin ratio had an improved ROC  
19  
20 274 curve for predicting PCOS. Serum albumin, which is commonly measured to assess liver  
21  
22 275 function and malnutrition, is not widely considered as an analyte of interest for PCOS.  
23  
24 276 However, this study showed for the first time that albumin is markedly reduced in women  
25  
26 277 with PCOS relative to controls. This may, at least in part, be due to albumin being a negative  
27  
28 278 acute phase protein<sup>18</sup>. It is also possible that there is increased oxidation and glycation of  
29  
30 279 albumin in women with PCOS - which can impact the structure, function and metabolism of  
31  
32 280 the protein<sup>18</sup>. As one of the most abundant serum proteins, among albumin's many roles is  
33  
34 281 the transport of hormones<sup>19</sup>. Thus, reduced albumin levels can potentially contribute to  
35  
36 282 higher free androgens in women with PCOS and exacerbation of disease phenotype.  
37  
38  
39  
40 283 This analysis was limited by a lack of a more sensitive measure of visceral adiposity; the gold  
41  
42 284 standard being imaging with computed tomography (CT) or magnetic resonance imaging  
43  
44 285 (MRI)<sup>30</sup>. Furthermore, the case-control design limited the ability to assess how CRP/albumin  
45  
46 286 performs in predicting health outcomes in women with PCOS. Prospective studies are now  
47  
48 287 needed to determine the use of CRP/albumin in predicting the progression of disorders linked  
49  
50 288 to chronic inflammation and metabolic dysfunction that women with PCOS are at increased  
51  
52 289 risk. These include not only cardiovascular disease and diabetes, but also depression<sup>31-34</sup>.  
53  
54  
55 290 Importantly, CRP/albumin ratio may be particularly useful in assessing the effectiveness of

1  
2  
3 291 new interventions targeting inflammation in women with PCOS as a novel approach to  
4  
5 292 managing the condition and its long-term health consequences.  
6  
7

8 293 *Conclusion:* CRP/albumin ratio, a marker for inflammation related to metabolic dysfunction,  
9  
10 294 is a better predictor of PCOS than either androgen excess or insulin resistance. Inflammation  
11  
12 295 is known to be influenced by adiposity, but relative to controls, women with PCOS have  
13  
14 296 higher levels of CRP/albumin ratio irrespective of BMI. This supports the view that  
15  
16 297 inflammation may play a central role in the pathophysiology of PCOS.  
17  
18

19 298

### 20 299 **Funding**

21  
22  
23 300 The analysis presented was supported by an operating grant provided by the Vancouver  
24  
25 301 Coastal Health Research Institute in support of Dr. Shirin Kalyan.  
26

### 27 302 **Acknowledgements**

28  
29 303 The authors would like to thank all the women who participated in this research. Without  
30  
31 304 their support and time, this work would not be possible.  
32  
33

### 34 305 **Competing Interests Statement**

35  
36 306 SK is Director of Scientific Innovation at Qu Biologics Inc., a clinical-stage biotechnology  
37  
38 307 company. All other authors have no conflict of interest to declare.  
39

### 40 308 **Author Contributions**

41  
42 309 SK designed the study, interpreted the data and wrote the first draft of the manuscript. AG  
43  
44 310 performed the statistical analysis and helped interpret the analysis. SS and WA collected all  
45  
46 311 the data, performed the biochemical analysis and managed the clinical operations of the  
47  
48 312 study. AJ assisted with literature review and manuscript preparation. All authors reviewed  
49  
50 313 and approved the final manuscript.  
51  
52

53 314  
54  
55  
56  
57  
58  
59  
60



315

316

**References**

317 1. Sirmans SM, Pate KA. Epidemiology, diagnosis, and management of polycystic ovary  
318 syndrome. *Clin Epidemiol*. 2013 Dec 18;6:1-13.

319 2. Azziz R, Woods KS, Reyna R, Key TJ, Knochenhauer ES, Yildiz BO. The prevalence and  
320 features of the polycystic ovary syndrome in an unselected population. *J Clin Endocrinol*  
321 *Metab*. 2004 Jun;89(6):2745-9.

322 3. Fauser BC, Tarlatzis BC, Rebar RW, et al. Consensus on women's health aspects of  
323 polycystic ovary syndrome (PCOS): The amsterdam ESHRE/ASRM-sponsored 3rd PCOS  
324 consensus workshop group. *Fertil Steril*. 2012 Jan;97(1):28,38.e25.

325 4. Azziz R, Carmina E, Dewailly D, et al. The androgen excess and PCOS society criteria for  
326 the polycystic ovary syndrome: The complete task force report. *Fertil Steril*. 2009  
327 Feb;91(2):456-88.

328 5. Azziz R. PCOS: A diagnostic challenge. *Reprod Biomed Online*. 2004 06;8(6):644-8.

329 6. Legro RS, Kusanman AR, Dodson WC, Dunaif A. Prevalence and predictors of risk for  
330 type 2 diabetes mellitus and impaired glucose tolerance in polycystic ovary syndrome: A  
331 prospective, controlled study in 254 affected women. *J Clin Endocrinol Metab*. 1999  
332 01;84(1):165-9.

333 7. Marciniak A, Nawrocka Rutkowska J, Brodowska A, Wisniewska B, Starczewski A.  
334 Cardiovascular system diseases in patients with polycystic ovary syndrome - the role of  
335 inflammation process in this pathology and possibility of early diagnosis and prevention. *Ann*  
336 *Agric Environ Med*. 2016 Dec 23;23(4):537-41.

- 1  
2  
3 337 8. Shorakae S, Teede H, de Courten B, Lambert G, Boyle J, Moran LJ. The emerging role of  
4  
5 338 chronic low-grade inflammation in the pathophysiology of polycystic ovary syndrome. *Semin*  
6  
7 339 *Reprod Med*. 2015 Jul;33(4):257-69.  
8  
9  
10 340 9. Ojeda-Ojeda M, Murri M, Insenser M, Escobar-Morreale HF. Mediators of low-grade  
11  
12 341 chronic inflammation in polycystic ovary syndrome (PCOS). *Curr Pharm Des*. 2013 Feb 20.  
13  
14  
15 342 10. Duleba AJ, Dokras A. Is PCOS an inflammatory process? *Fertil Steril*. 2012 Jan;97(1):7-  
16  
17 343 12.  
18  
19  
20  
21 344 11. Kelly CC, Lyall H, Petrie JR, Gould GW, Connell JM, Sattar N. Low grade chronic  
22  
23 345 inflammation in women with polycystic ovarian syndrome. *J Clin Endocrinol Metab*. 2001  
24  
25 346 Jun;86(6):2453-5.  
26  
27  
28 347 12. Pepys MB, Hirschfield GM. C-reactive protein: A critical update. *J Clin Invest*. 2003  
29  
30 348 Jun;111(12):1805-12.  
31  
32  
33  
34 349 13. Lau DC, Dhillon B, Yan H, Szmitko PE, Verma S. Adipokines: Molecular links between  
35  
36 350 obesity and atherosclerosis. *Am J Physiol Heart Circ Physiol*. 2005 May;288(5):H2031-41.  
37  
38  
39 351 14. Escobar-Morreale HF, Luque-Ramirez M, Gonzalez F. Circulating inflammatory markers  
40  
41 352 in polycystic ovary syndrome: A systematic review and metaanalysis. *Fertil Steril*. 2011 Mar  
42  
43 353 1;95(3):1048,58.e1-2.  
44  
45  
46  
47 354 15. Samy N, Hashim M, Sayed M, Said M. Clinical significance of inflammatory markers in  
48  
49 355 polycystic ovary syndrome: Their relationship to insulin resistance and body mass index. *Dis*  
50  
51 356 *Markers*. 2009;26(4):163-70.  
52  
53  
54  
55  
56  
57  
58  
59  
60

- 1  
2  
3 357 16. Hughan KS, Tfyali H, Warren-Ulanch JG, Barinas-Mitchell E, Arslanian SA. Early  
4  
5 358 biomarkers of subclinical atherosclerosis in obese adolescent girls with polycystic ovary  
6  
7 359 syndrome. *J Pediatr*. 2016 Jan;168:104,11.e1.  
8  
9  
10 360 17. Carvalho LM, Ferreira CN, Soter MO, et al. Microparticles: Inflammatory and  
11  
12 361 haemostatic biomarkers in polycystic ovary syndrome. *Mol Cell Endocrinol*. 2017 Mar  
13  
14 362 5;443:155-62.  
15  
16  
17  
18 363 18. Levitt DG, Levitt MD. Human serum albumin homeostasis: A new look at the roles of  
19  
20 364 synthesis, catabolism, renal and gastrointestinal excretion, and the clinical value of serum  
21  
22 365 albumin measurements. *Int J Gen Med*. 2016 Jul 15;9:229-55.  
23  
24  
25 366 19. Zeginiadou T, Koliass S, Kouretas D, Antonoglou O. Nonlinear binding of sex steroids to  
26  
27 367 albumin and sex hormone binding globulin. *Eur J Drug Metab Pharmacokinet*. 1997 Jul-  
28  
29 368 Sep;22(3):229-35.  
30  
31  
32  
33 369 20. Kalyan S, Hitchcock CL, Sirrs S, Pudek M, Prior JC. Cardiovascular and metabolic  
34  
35 370 effects of medroxyprogesterone acetate versus conjugated equine estrogen after  
36  
37 371 premenopausal hysterectomy with bilateral ovariectomy. *Pharmacotherapy*. 2010  
38  
39 372 May;30(5):442-52.  
40  
41  
42  
43 373 21. Kalyan S, Patel MS, Kingwell E, Cote HCF, Liu D, Prior JC. Competing factors link to  
44  
45 374 bone health in polycystic ovary syndrome: Chronic low-grade inflammation takes a toll. *Sci*  
46  
47 375 *Rep*. 2017 Jun 13;7(1):3432,017-03685-x.  
48  
49  
50 376 22. The Rotterdam ESHRE/ASRM-Sponsored PCOS Consensus, Workshop Group. Revised  
51  
52 377 2003 consensus on diagnostic criteria and long-term health risks related to polycystic ovary  
53  
54 378 syndrome. *Fertil Steril*. 2004 01;81(1):19-25.  
55  
56  
57  
58  
59  
60

- 1  
2  
3 379 23. Lihn AS, Pedersen SB, Richelsen B. Adiponectin: Action, regulation and association to  
4  
5 380 insulin sensitivity. *Obes Rev.* 2005 Feb;6(1):13-21.  
6  
7  
8 381 24. Dimitriadis GK, Kyrou I, Randeve HS. Polycystic ovary syndrome as a proinflammatory  
9  
10 382 state: The role of adipokines. *Curr Pharm Des.* 2016;22(36):5535-46.  
11  
12  
13 383 25. Cardoso CR, Leite NC, Salles GF. Prognostic importance of C-reactive protein in high  
14  
15 384 cardiovascular risk patients with type 2 diabetes mellitus: The rio de janeiro type 2 diabetes  
16  
17 385 cohort study. *J Am Heart Assoc.* 2016 Oct 26;5(11):e004554.  
18  
19  
20  
21 386 26. Chen TH, Gona P, Sutherland PA, et al. Long-term C-reactive protein variability and  
22  
23 387 prediction of metabolic risk. *Am J Med.* 2009 Jan;122(1):53-61.  
24  
25  
26 388 27. Rutter MK, Meigs JB, Sullivan LM, D'Agostino RB S, Wilson PW. C-reactive protein,  
27  
28 389 the metabolic syndrome, and prediction of cardiovascular events in the framingham offspring  
29  
30 390 study. *Circulation.* 2004 Jul 27;110(4):380-5.  
31  
32  
33  
34 391 28. Choi J, Joseph L, Pilote L. Obesity and C-reactive protein in various populations: A  
35  
36 392 systematic review and meta-analysis. *Obes Rev.* 2013 Mar;14(3):232-44.  
37  
38  
39 393 29. Kraus VB, Jordan JM. Serum C-reactive protein (CRP), target for therapy or trouble?  
40  
41 394 *Biomark Insights.* 2007 Feb 7;1:77-80.  
42  
43  
44  
45 395 30. Shuster A, Patlas M, Pinthus JH, Mourtzakis M. The clinical importance of visceral  
46  
47 396 adiposity: A critical review of methods for visceral adipose tissue analysis. *Br J Radiol.* 2012  
48  
49 397 Jan;85(1009):1-10.  
50  
51  
52  
53  
54  
55  
56  
57  
58  
59  
60

- 1  
2  
3 398 31. Faugere M, Micoulaud-Franchi JA, Faget-Agius C, Lancon C, Cermolacce M, Richieri R.  
4  
5 399 Quality of life is associated with chronic inflammation in depression: A cross-sectional study.  
6  
7 400 J Affect Disord. 2017 Nov 14;227:494-7.  
8  
9  
10 401 32. Chirinos DA, Murdock KW, LeRoy AS, Fagundes C. Depressive symptom profiles,  
11  
12 402 cardio-metabolic risk and inflammation: Results from the MIDUS study.  
13  
14 403 Psychoneuroendocrinology. 2017 Aug;82:17-25.  
15  
16  
17  
18 404 33. Barry JA, Kuczmierczyk AR, Hardiman PJ. Anxiety and depression in polycystic ovary  
19  
20 405 syndrome: A systematic review and meta-analysis. Hum Reprod. 2011 Sep;26(9):2442-51.  
21  
22  
23 406 34. Dokras A, Clifton S, Futterweit W, Wild R. Increased risk for abnormal depression scores  
24  
25 407 in women with polycystic ovary syndrome: A systematic review and meta-analysis. Obstet  
26  
27 408 Gynecol. 2011 Jan;117(1):145-52.  
28  
29  
30  
31 409  
32  
33 410

1  
2  
3 411

4 412 **Figure Legends**

5  
6 413 **Figure 1.** Receiver Operating Characteristic (ROC) curve plotting the true positive rate

7  
8 414 against the false positive rate for CRP/Albumin (green line) and CRP (blue line) in

9  
10 415 differentiating women with and without PCOS. The area under the curve (AUC) for

11  
12 416 CRP/Albumin: 0.865, 95% CI: 0.824-0.905; for CRP: 0.820, 95% CI: 0.773-0.867.

13  
14  
15 417

16  
17 418 **Figure 2.** Scatter plot analysis showing the age-adjusted CRP/albumin values by body mass

18  
19 419 index (BMI) in women with PCOS and controls.

20  
21  
22 420

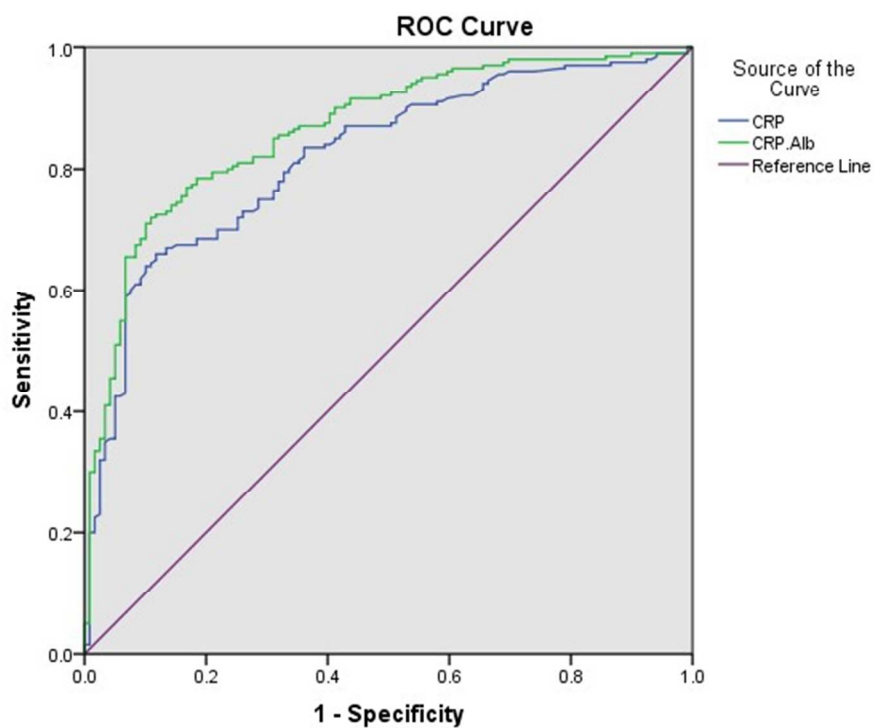

33 Figure 1. Receiver Operating Characteristic (ROC) curve plotting the true positive rate against the false  
34 positive rate for CRP/Albumin (green line) and CRP (blue line) in differentiating women with and without  
35 PCOS. The area under the curve (AUC) for CRP/Albumin: 0.865, 95% CI: 0.824-0.905; for CRP: 0.820, 95%  
36 CI: 0.773-0.867.

37 165x132mm (96 x 96 DPI)

38  
39  
40  
41  
42  
43  
44  
45  
46  
47  
48  
49  
50  
51  
52  
53  
54  
55  
56  
57  
58  
59  
60

only

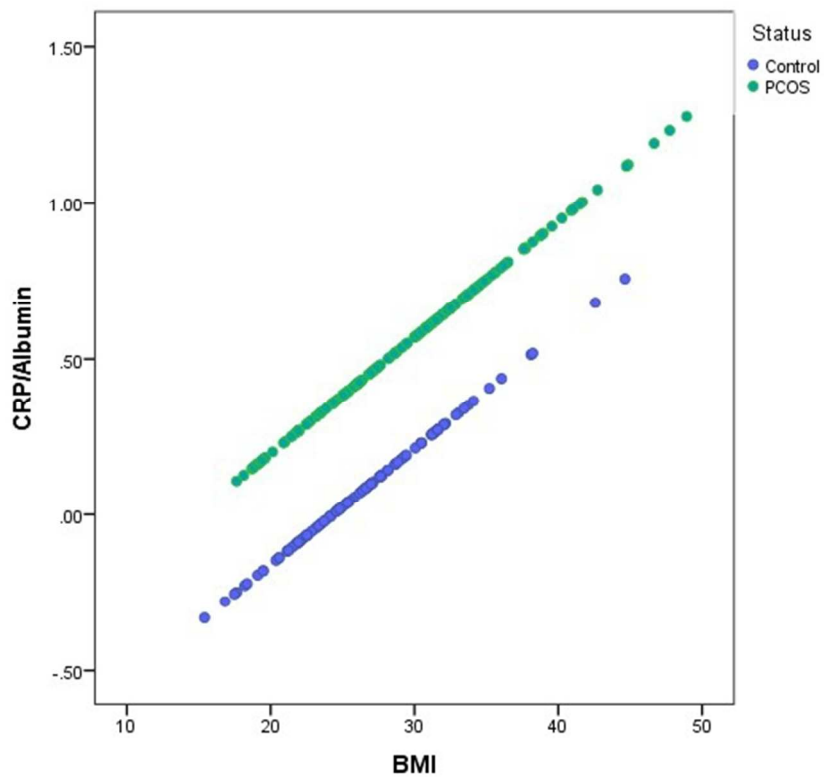

Figure 2. Scatter plot analysis showing the age-adjusted CRP/albumin values by body mass index (BMI) in women with PCOS and controls.

166x133mm (96 x 96 DPI)



# BMJ Open

## Assessing C-reactive protein/albumin ratio as a new predictor of Polycystic Ovary Syndrome: a case-control study of women from Bahraini medical clinics

|                                 |                                                                                                                                                                                                                                                            |
|---------------------------------|------------------------------------------------------------------------------------------------------------------------------------------------------------------------------------------------------------------------------------------------------------|
| Journal:                        | <i>BMJ Open</i>                                                                                                                                                                                                                                            |
| Manuscript ID                   | bmjopen-2018-021860.R1                                                                                                                                                                                                                                     |
| Article Type:                   | Research                                                                                                                                                                                                                                                   |
| Date Submitted by the Author:   | 16-May-2018                                                                                                                                                                                                                                                |
| Complete List of Authors:       | Kalyan, Shirin; University of British Columbia, Medicine; Goshtasebi, Azita; University of British Columbia, Medicine Sarray, Sameh; Arabian Gulf University Joannou, Angela; University of British Columbia, Medicine Almawi, Wassim; El-Manar University |
| <b>Primary Subject Heading</b>: | Obstetrics and gynaecology                                                                                                                                                                                                                                 |
| Secondary Subject Heading:      | Diabetes and endocrinology                                                                                                                                                                                                                                 |
| Keywords:                       | polycystic ovary syndrome, inflammation, C-reactive protein, albumin, pathophysiology                                                                                                                                                                      |
|                                 |                                                                                                                                                                                                                                                            |

SCHOLARONE™  
Manuscripts

1  
2  
3 **1 Assessing C-reactive protein/albumin ratio as a new predictor of Polycystic Ovary**  
4  
5 **2 Syndrome: a case-control study of women from Bahraini medical clinics**  
6

7  
8 3  
9 4 Short title: CRP/Albumin as a predictor of PCOS  
10 5  
11 6

12 7 Shirin Kalyan <sup>1\*</sup>, Azita Goshtesabi <sup>1</sup>, Sameh Sarray <sup>2,3</sup>, Angela Joannou <sup>1</sup>, Wassim Almawi <sup>3</sup>  
13 8  
14 9

15 10 <sup>1</sup>CeMCOR, Division of Endocrinology, Department of Medicine, University of British  
16 11 Columbia, Vancouver, BC, Canada  
17 12

18 13 <sup>2</sup>Arabian Gulf University, Department of Medical Biochemistry, Manama Bahrain  
19 14

20 15 <sup>3</sup>Faculty of Sciences, El-Manar University, Tunis, Tunisia.  
21  
22

23 16  
24 17  
25 18  
26 19 \*Corresponding author:  
27 20 Dr. Shirin Kalyan  
28 21

29 22 Rm 4139, Diamond Health Care Centre  
30 23 Division of Endocrinology  
31 24 Department of Medicine  
32 25 University of British Columbia  
33 26

34 27 Email: [shirin.kalyan@ubc.ca](mailto:shirin.kalyan@ubc.ca)  
35 28  
36 29  
37 30

38 31 Keywords: polycystic ovary syndrome, inflammation, pathophysiology, C-reactive protein,  
39 32 albumin  
40 33

41 34 Word count: 2409 (main article)  
42  
43  
44  
45  
46  
47  
48  
49  
50  
51  
52  
53  
54  
55  
56  
57  
58  
59  
60

1  
2  
3 35  
4 36 **Abstract**

5  
6 37 *Objective:* Polycystic ovary syndrome (PCOS) is an endocrine disorder affecting  
7  
8 38 approximately one in seven women who experience androgen excess, menstrual cycle  
9  
10 39 irregularities, frequent anovulation, and a tendency for central obesity and insulin resistance.  
11  
12 40 Chronic subclinical inflammation is now recognized as being common in the context of  
13  
14 41 PCOS, which led to the postulation that PCOS may fundamentally be an inflammatory  
15  
16 42 process. This study aimed to: 1) evaluate serum CRP/albumin ratio as a predictor of PCOS;  
17  
18 43 2) compare the relationship between CRP/albumin and PCOS to variables classically  
19  
20 44 associated with the syndrome.

21  
22  
23 45 *Design:* Case-control study.

24  
25 46 *Setting:* Adult obstetrics/gynaecology, endocrinology and outpatient clinics; university  
26  
27 47 hospital in Bahrain.

28  
29 48 *Participants:* 200 premenopausal women with a diagnosis of PCOS, and 119 ethnically-  
30  
31 49 matched eumenorrheic premenopausal women.

32  
33 50 *Main Outcome Measures:* CRP/albumin ratio, anthropometric measures, insulin resistance,  
34  
35 51 androgen excess.

36  
37 52 *Results:* Independent of body mass index (BMI), receiver operating characteristic (ROC)  
38  
39 53 curve for CRP/albumin ratio as predictor of PCOS was 0.865 (95% CI: 0.824–0.905), which  
40  
41 54 was more sensitive than CRP alone. Binary regression analysis showed that CRP/albumin  
42  
43 55 ratio outperformed classical correlates, free androgen index and insulin resistance, in  
44  
45 56 predicting PCOS for every BMI category.

46  
47 57 *Conclusion:* CRP/albumin ratio, a marker for inflammation related to metabolic dysfunction,  
48  
49 58 better predicts PCOS than either androgen excess or insulin resistance. Inflammation is  
50  
51 59 known to be influenced by adiposity, but relative to controls, women with PCOS have higher  
52  
53  
54  
55  
56  
57  
58  
59

1  
2  
3 60 levels of CRP/albumin irrespective of BMI. These findings support the view that  
4  
5 61 inflammation plays a central role in the pathophysiology of PCOS.

6  
7 62

8  
9 63

## 10 11 64 **Article Summary**

### 12 13 65 *Strengths and limitations of this study*

- 14  
15  
16 66 • This analysis addressed previous limitations of studies, namely small sample sizes,  
17  
18 67 heterogeneous populations, and confounding factors (such as BMI), that have  
19  
20 68 attempted to show PCOS is an inflammatory process
- 21  
22 69 • The relationship between inflammation and PCOS was assessed using CRP/albumin  
23  
24 70 ratio, which may be a better marker for inflammation in the context of metabolic  
25  
26 71 dysfunction
- 27  
28  
29 72 • Limitation: study used waist circumference as a substitute for visceral adiposity; gold  
30  
31 73 standard is computed tomography (CT) or magnetic resonance imaging (MRI)

32  
33 74  
34  
35  
36  
37  
38  
39  
40  
41  
42  
43  
44  
45  
46  
47  
48  
49  
50  
51  
52  
53  
54  
55  
56  
57  
58  
59  
60

## 75 **Introduction**

76 Polycystic ovary syndrome (PCOS) is the most common reproductive disorder, affecting 5 to  
77 15 % of premenopausal women worldwide, [1, 2] and the prevalence of PCOS appears to be  
78 increasing. [1] This rise may partly be attributed to improved diagnosis as well as to an  
79 increase in environmental factors that predispose to the development of this complex  
80 metabolic condition. PCOS is characterized by androgen excess, menstrual irregularities,  
81 ovulatory disturbances, and is often associated with central obesity and insulin resistance. [3-  
82 5] As such, women with PCOS are at an increased risk for a number of health issues,  
83 including infertility, cardiovascular disease and diabetes. [3, 6, 7]  
84 Possibly related to the constellation of endocrine and metabolic dysfunction they experience,  
85 women with PCOS are also found to have greater chronic subclinical inflammation, [8-11]  
86 which is often clinically assessed by measuring serum levels of C-reactive protein (CRP).  
87 CRP is a liver-derived acute phase protein produced in response to IL-6 secreted from  
88 activated cells such as macrophages and adipocytes. [12, 13] A meta-analysis of 31 studies  
89 concluded that systemic CRP levels are 96% higher in women with PCOS compared to  
90 control women. [14] Collectively, these findings have given rise to the speculation that  
91 inflammation may play a pivotal role in the pathophysiology of PCOS. [8-10]  
92 Elevated serum CRP levels are linked to several health risk factors experienced by women  
93 with PCOS, particularly insulin resistance and heightened risk of type 2 diabetes. [7, 15, 16]  
94 Chronic inflammation also contributes to endothelial dysfunction, exacerbating the  
95 development of atherosclerotic plaques, triggering the onset of cardiovascular disease (CVD).  
96 [17] As such inflammation has been associated with both CVD and coronary artery disease in  
97 women with PCOS. [10]

1  
2  
3 98 In contrast to CRP, albumin is a negative acute phase response protein produced by the liver.  
4  
5 99 Serum levels of albumin are reduced in individuals experiencing chronic inflammation. [18]  
6  
7 100 In addition to its role as a binding molecule for sex steroids, [19] albumin also provides the  
8  
9 101 majority of the total antioxidant capacity of normal plasma. [18] The ratio of serum CRP  
10  
11 102 levels over serum albumin (CRP/albumin) was found to be strongly associated with more  
12  
13 103 severe metabolic dysfunction in premenopausal women with induced alterations to their  
14  
15 104 ovarian hormone status. [20] CRP/albumin ratio was also found to be significantly higher in  
16  
17 105 premenopausal women with PCOS relative to controls, and adversely predicted their bone  
18  
19 106 quality. [21] Given the ability of CRP/albumin to simultaneously capture chronic  
20  
21 107 inflammation and metabolic dysfunction in premenopausal women, we hypothesized that  
22  
23 108 CRP/albumin ratio would, in itself, serve as a strong predictor of PCOS in a cohort of  
24  
25 109 similarly aged women. This case-control study investigated CRP/albumin ratio along with  
26  
27 110 classical markers, androgen excess and insulin resistance, in their ability to predict PCOS in  
28  
29 111 319 premenopausal Bahraini Arab women.  
30  
31  
32

33 112

35 113 **Methods**37 114 *Patient and public involvement*

39 115 The development of the research question and the study's setting was influenced by the wish  
40  
41 116 many women in Bahrain have to bear children. Infertility is a consequence of PCOS, [22] and  
42  
43 117 the combination of both can impact women's health-related quality of life. [23] Patients were  
44  
45 118 not involved in the design of the study or the recruitment. Study participants will not be re-  
46  
47 119 contacted by the study investigators; however, the results of this study will be disseminated to  
48  
49 120 the Bahraini community through press releases of the open access publication.  
50  
51

52 121 *Study subjects*

1  
2  
3 122 Women with PCOS (n = 200) were recruited from adult obstetrics/gynecology,  
4  
5 123 endocrinology and outpatient clinics in Manama, Bahrain. Women without PCOS (n = 119)  
6  
7 124 were ethnically-matched, eumenorrheic university employees and students, and healthy  
8  
9 125 volunteers representative of the Bahraini population. The sample size was based on the  
10  
11 126 ability to detect differences between cases and controls with 10% precision (two-tailed t-test  
12  
13 127 with  $\alpha=0.05$ ) and 80% power, taking into account the estimated prevalence of PCOS in  
14  
15 128 Bahrain of 7.5-8.0% (unpublished data; Bahraini Ministry of Health) and Z-value for 95% CI  
16  
17 129 (confidence interval). Women serving as controls were examined in the follicular phase of  
18  
19 130 their menstrual cycle and had their testosterone levels were within range. A diagnosis of  
20  
21 131 PCOS was based on the 2003 Rotterdam Criteria, which requires two of the three following  
22  
23 132 criteria to be met: ultrasound evidence of polycystic ovarian morphology, anovulation, and  
24  
25 133 hyperandrogenism. [24] Exclusion criteria included hyperprolactinemia, non-classical adrenal  
26  
27 134 hyperplasia, androgen-producing tumors, 21-hydroxylase deficiency, Cushing's syndrome,  
28  
29 135 and active thyroid disease. Additional exclusion criteria included extremes of body mass  
30  
31 136 index (BMI;  $<18 \text{ kg/m}^2$  or  $>45 \text{ kg/m}^2$ ), recent/present illness, and treatment affecting  
32  
33 137 carbohydrate metabolism or hormonal levels, for three months or longer before inclusion the  
34  
35 138 study. Women using anti-hypertensive, oral contraceptive, anti-inflammatory, and lipid-  
36  
37 139 lowering drugs were also excluded. Demographic information, along with detailed personal  
38  
39 140 and family history of diabetes, hypertension, infertility, hypercholesterolemia, and ischemic  
40  
41 141 heart disease were obtained from all participants. This study was conducted in accord with  
42  
43 142 the Helsinki II Declaration guidelines, and all participants gave written informed consent to  
44  
45 143 participate. Study approval was obtained from the Bahraini Ministry of Health and Arabian  
46  
47 144 Gulf University Research and Ethics Committees (IRB number: 35-PI-01/15) and the Clinical  
48  
49 145 Research Ethics Board of the University of British Columbia (H16-02101).  
50  
51  
52  
53  
54  
55 146

147 *Biochemical analysis*

148 Peripheral venous fasting blood samples were obtained between 7:00 and 9:00 am following  
149 an overnight (> 12 h) fast during the early follicular phase of the menstrual cycle (days  $2 \pm 5$ )  
150 for control women, or women with PCOS who did not present with menstrual irregularities,  
151 or any day for women with PCOS with menstrual irregularities. Serum samples were  
152 analyzed for sex hormone binding globulin (SHBG) by sandwich ELISA (R&D Systems,  
153 Minneapolis, MN); assay sensitivity was 0.01 nmol/ml, and inter-assay and intra-assay  
154 precision (CV %) were 5.3% and 4.3%, respectively.

155 Serum luteinizing hormone (LH), follicular stimulating hormone (FSH), thyroid stimulating  
156 hormone (TSH), testosterone, glucose (ADVIA Centaur, Bayer Vital, Fernwald, Germany),  
157 and insulin (IMMULITE 2000, DPC Biermann, Bad Nauheim, Germany), were measured by  
158 automated chemiluminescence immunoassays. Free (FT) and bioactive (BT) testosterone and  
159 free androgen index (FAI) were determined using Free & Bioavailable Testosterone  
160 Calculator ([www.issam.ch/freetesto.htm](http://www.issam.ch/freetesto.htm)). Concentrations of serum albumin were analyzed  
161 by photospectrometry with albumin bromocresol purple assay on a COBAS c701 Chemistry  
162 Analyzer (Roche Diagnostics, Dubai, UAE). Insulin resistance (IR) was estimated by the  
163 homeostasis model assessment (HOMA-IR), defined as fasting serum insulin (IU/mL)  $\times$   
164 fasting plasma glucose (mmol/L)/22.5. HOMA-IR values were characterized as Normal  
165 (insulin-sensitive) if <2.40; Borderline if between 2.40-3.50, and High (insulin-resistant) if >  
166 3.50.

167

168 Measurement of plasma high sensitivity CRP levels was done by latex-enhanced  
169 nephelometry on a BN II Nephelometer (Dade Behring, Milan, Italy). Samples were assayed  
170 in duplicate in each analytical run; the lower limit of detection was 0.15 mg/L, and the assay



1  
2  
3 171 range was 0.175–11.0 mg/L (initial dilution). Serial serum dilutions were made in measuring  
4  
5 172 high CRP (>30 mg/L) levels. Percentile CRP values were estimated for comparison  
6  
7 173 purposes.  
8  
9

#### 10 174 *Statistical analysis*

11  
12 175 The *core outcome set* of variables included assessment of CRP/albumin as a predictor of  
13  
14 176 PCOS while controlling for relevant factors, such as BMI and age, and to subsequently  
15  
16 177 compare the strength of the relationship between CRP/albumin and PCOS with variables  
17  
18 178 known to strongly link to the syndrome, namely androgen excess and insulin resistance. The  
19  
20 179 Shapiro-Wilk test was used to evaluate the distribution of the variables, and many variables  
21  
22 180 for the PCOS cohort were flagged as being non-normally distributed. However, upon testing  
23  
24 181 for skewness, we found the values for asymmetry and kurtosis fell between -2 to +2 for all.  
25  
26 182 Thus, we used parametric tests, as suggested, [25] given the sample sizes were >30. We  
27  
28 183 reassessed the validity of our analysis by running the Mann–Whitney U test in addition to  
29  
30 184 student t test for variables we had detected as being non-normal and confirmed that the  
31  
32 185 results were similar. Baseline characteristics were compared using the Mann-Whitney U test  
33  
34 186 and the independent samples t-test for the continuous variables, and the  $\chi^2$  test for categorical  
35  
36 187 variables. Numerical variables are presented as mean  $\pm$  standard deviation (SD). Because  
37  
38 188 distribution of CRP/albumin levels was skewed to the right, correlations between  
39  
40 189 CRP/albumin ratio and other continuous variables were assessed using Spearman's rho.  
41  
42 190 Univariate general linear models were applied to test independent associations between  
43  
44 191 CRP/albumin ratio and other independent variables.  
45  
46  
47  
48

49 192 The optimal cut-off level for the CRP/albumin ratio was determined by a receiver operating  
50  
51 193 characteristic (ROC) curve analysis, and the areas under the curve (AUC) were measured and  
52  
53 194 compared to assess the power of a model to identify patients who experienced metabolic  
54  
55 195 disturbances. Cut-off values showing the greatest accuracy were determined using a  
56  
57  
58  
59  
60

1  
2  
3 196 sensitivity/specificity versus criterion value plot. Quartiles (i.e. 0-25%, 26-50%, 51-75%, and  
4  
5 197 76-100%) of CRP and CRP/albumin ratio were calculated separately in PCOS and control  
6  
7 198 groups. Because the 25% quartile of CRP value in the PCOS cohort was similar to the  
8  
9 199 standard normal values of CRP, we used the 25% quartile of CRP and CRP/albumin ratio as  
10  
11 200 the cut-off point for both predictors..

14 201 Using the calculated cut-off values, regression analysis was performed to determine how well  
15  
16 202 each variable predicted PCOS. To fully explore the role of the CRP/albumin ratio as a  
17  
18 203 biomarker in the prediction of metabolic disturbances, CRP and CRP/albumin ratio were  
19  
20 204 additionally assessed as binary variables. Subjects were categorized into two groups based on  
21  
22 205 the cut-off values and their means (SD) for metabolic markers. Insulin resistance (HOMA-  
23  
24 206 IR), free testosterone, total adiponectin, BMI and TSH were compared between subjects with  
25  
26 207 normal values, and those who had higher than normal values. P-values <0.05 were considered  
27  
28 208 as statistically significant. All statistical analyses were performed using the IBM SPSS  
29  
30 209 statistics software program version 22 (IBM, Armonk, NY).

31  
32  
33  
34 210

## 36 211 **Results**

### 38 212 *Study subjects*

40  
41 213 The sociodemographic, anthropometric, clinical, and biochemical characteristics of the 200  
42  
43 214 women with PCOS and 119 controls women are summarized in **Table 1**. Relative to controls,  
44  
45 215 women with PCOS had fewer pregnancies and live births ( $p<0.001$ ), were more likely to  
46  
47 216 have insulin resistance ( $p<0.001$ ), and differed in education attainment with those with  
48  
49 217 PCOS, having a higher number of high school and post-secondary graduates ( $p=0.012$ ).

### 51 52 218 *Metabolic characteristics*

219 The proportion of women with a BMI greater than 30 kg/m<sup>2</sup> were higher in the PCOS cohort  
 220 than controls (p<0.001), but the waist-to-hip ratio was not significantly different (**Table 1**).  
 221 Serum levels of adiponectin, an adipocyte-associated protein that tends to be inversely linked  
 222 to visceral adiposity, [26] was markedly lower in women with PCOS compared to controls.  
 223 Fasting plasma glucose, cholesterol, HDL, LDL and triglyceride levels did not differ  
 224 significantly between women with and without PCOS. However, indices of insulin resistance  
 225 and insulin sensitivity (HOMA-IR and QUICKI) indicated that women with PCOS had  
 226 greater impaired regulation of insulin compared to controls (**Table 1**).

227 **Table 1: Demographic, clinical and hormonal characteristics of study population:**  
 228 **women with polycystic ovary syndrome (PCOS) and controls.**

229 Data are presented as means (standard deviation).

|                             | All<br>(N=319) | PCOS<br>(N=200) | Controls<br>(N=119) | Mean<br>difference | 95 % CI of Mean<br>Difference |        |
|-----------------------------|----------------|-----------------|---------------------|--------------------|-------------------------------|--------|
|                             |                |                 |                     |                    | lower                         | upper  |
| Age (yrs)                   | 27.9 (6.4)     | 28.4 (5.9)      | 27.2 (7.2)          | 1.24               | -0.22                         | 2.71   |
| BMI (kg/m <sup>2</sup> )    | 28 (5.9)       | 29 (6.3)        | 26.5 (5)            | 2.53               | 1.19                          | 3.87   |
| Waist/hip ratio             | 0.94 (0.09)    | 0.94 (0.09)     | 0.93 (0.09)         | 0.0067             | -0.017                        | 0.031  |
| Menarche (yrs)              | 12.5 (1.4)     | 12.5 (1.5)      | 12.4 (1.2)          | 0.12               | -0.21                         | 0.45   |
| HOMA-IR                     | 3.2 (0.18)     | 3.8 (0.26)      | 2.1 (0.2)           | 1.67               | 0.94                          | 2.4    |
| QUICKI                      | 0.6 (0.006)    | 0.57 (0.008)    | 0.65 (.01)          | -0.078             | -0.10                         | -0.05  |
| Total adiponectin<br>(ng/L) | 33.8 (1.4)     | 28.4 (1.3)      | 44.6 (2.9)          | -16.25             | -21                           | -10    |
| Albumin (g/L)               | 37.3 (0.46)    | 32.7 (0.46)     | 45 (0.35)           | -12.22             | -13.52                        | -10.93 |
| CRP (mg/L)                  | 11.1 (1.1)     | 15.5 (1.6)      | 3.6 (0.85)          | 11.89              | 7.61                          | 16.17  |
| CRP/Albumin ratio           | 0.36 (0.04)    | 0.53 (0.06)     | 0.08 (0.02)         | 0.45               | 0.29                          | 0.61   |

|                         |               |               |               |        |       |        |
|-------------------------|---------------|---------------|---------------|--------|-------|--------|
| SHBG (nmol/L)           | 60.1 (1.5)    | 52.2 (1.4)    | 72 (2.8)      | -19.72 | -26.5 | -13.93 |
| Free testosterone index | 0.025 (0.001) | 0.029 (0.001) | 0.017 (0.001) | 0.011  | 0.007 | 0.015  |

230

231 BMI: Body Mass Index, HOMA.IR: Homeostatic Model Assessment for Insulin Resistance,

232 QUICKI: Quantitative insulin sensitivity check index, CRP: C-reactive protein, SHBG: Sex

233 hormone binding hormone.

234 *Reproductive hormone characteristics*

235 There were no statistically significant differences in plasma levels of estradiol, progesterone,

236 total testosterone, prolactin, FSH, LH and DHES between women with and without PCOS.

237 Free testosterone was higher and SHBG lower in women with PCOS (**Table 1**).238 *C-reactive protein (CRP)/albumin ratio as a predictor of polycystic ovary syndrome (PCOS)*239 *stratified by body mass index (BMI)*

240 Women with PCOS had markedly higher levels of CRP and lower levels of serum albumin

241 relative to controls ( $p < 0.001$ ; **Table 1**). ROC curve analysis showed that the CRP/albumin

242 ratio had greater discriminatory power to differentiate between women with PCOS and

243 controls (AUC: 0.865, 95% CI: 0.824-0.905) compared to CRP alone (AUC: 0.820, 95% CI:

244 0.773-0.867); **Figure 1**. This greater efficacy of CRP/albumin ratio to discriminate between

245 cases and controls was also evident when taking into account the presence of insulin

246 resistance at every measure of sensitivity; for a sensitivity level of 75%, CRP/albumin ratio

247 had a specificity of 85% compared to 69% for CRP alone.

248 Spearman correlation analysis between CRP/albumin ratios and clinical and biochemical

249 markers was subsequently performed. Variables found to be univariately linked to

250 CRP/albumin values were included in a general linear model testing the relationship amongst

251 PCOS diagnosis, BMI, and CRP/albumin levels. The model revealed that for any given BMI  
 252 value, women with PCOS have markedly elevated CRP/albumin levels ( $p < 0.001$ , **Figure 2**).

253 Variables that are known to strongly associate with PCOS, namely free androgen index and  
 254 insulin resistance, were compared to CRP/albumin ratio as predictors of PCOS in a binary  
 255 regression analysis stratified by three BMI categories:  $< 25 \text{ kg/m}^2$  [normal],  $25 - 30 \text{ kg/m}^2$   
 256 [overweight],  $> 30 \text{ kg/m}^2$  [obese]; **Table 2**. A CRP/albumin ratio of  $\geq 0.097$  outperformed  
 257 both insulin resistance and free androgen index in predicting PCOS for every BMI category  
 258 (**Table 2**).

260 **Table 2: Summary of binary Regression Analysis for Variables Predicting PCOS with**  
 261 **the Odds Ratio of each risk factor adjusted for other variables in the model**

|                                  | Odds Ratio (95% Confidence Interval) |                           |                          |
|----------------------------------|--------------------------------------|---------------------------|--------------------------|
|                                  | BMI < 25<br>(normal)                 | BMI 25-30<br>(overweight) | BMI $\geq$ 30<br>(obese) |
| CRP/Albumin Ratio <sup>1</sup>   |                                      |                           |                          |
| < 0.097                          | 1                                    | 1                         | 1                        |
| $\geq 0.097$                     | 11.21 (3.28-39.75)                   | 19.32 (5.07-72.17)        | 34.5 (7.75-153.52)       |
| Insulin Resistance <sup>2</sup>  |                                      |                           |                          |
| No                               | 1                                    | 1                         | 1                        |
| Borderline                       | 3.34 (0.645-17.33)                   | 5.58 (0.907-34.41)        | 3.13 (0.53-18.48)        |
| Yes                              | 9.21 (1.63-51.93)                    | 8.81 (1.75-44.31)         | 17.94 (1.81-177.61)      |
| Free Androgen Index <sup>3</sup> |                                      |                           |                          |
| < 3.95                           | 1                                    | 1                         | 1                        |
| $\geq 3.95$                      | 2.28 (.536-9.75)                     | 0.86 (.22-3.35)           | 3.79 (0.59-24.42)        |

263

1  
2  
3 264 <sup>1</sup>Cut-off values were derived from the sensitivity and specificity analysis of the receiver  
4  
5 265 operating characteristic curve

6  
7 266 <sup>2</sup>Categories of insulin resistance based on normal values used for HOMA-IR

8  
9 267 <sup>3</sup>Cut-off values from normal laboratory reference ranges for free androgen index

10  
11 268

## 12 13 269 **Discussion**

14  
15 270 This study demonstrated that CRP/albumin ratio is a better predictor of PCOS than both free  
16  
17 271 androgens and insulin resistance in 319 ethnically-matched premenopausal women, and this  
18  
19 272 relationship was independent of BMI. Despite being the most common reproductive disorder  
20  
21 273 to affect women, the etiology of PCOS has remained elusive to date. In the absence of a  
22  
23 274 definitive cure, treatment has focused on symptom management, and a goal to prevent the  
24  
25 275 progression of serious health conditions, such as type 2 diabetes and CVD, for which women  
26  
27 276 with PCOS are at heightened risk. Chronic low-grade inflammation has emerged as a  
28  
29 277 common underlying state in women with PCOS, and a likely direct contributor to insulin  
30  
31 278 resistance and heart disease risk. This has raised the question whether PCOS is fundamentally  
32  
33 279 an inflammatory condition. [8, 10, 27]

34  
35  
36  
37  
38 280 Small sample sizes, heterogeneous populations, and an inability to correct for confounding  
39  
40 281 factors, such as BMI and use of oral contraceptives, both of which influence inflammatory  
41  
42 282 markers such as CRP, [21] has in part hampered efforts in assigning inflammation as truly a  
43  
44 283 defining feature of PCOS. This current analysis has overcome some of the main issues in  
45  
46 284 assessing the independent relationship between PCOS and chronic low-grade inflammation.  
47  
48 285 This was accomplished by accounting for many of the confounding variables and by using a  
49  
50 286 more refined marker for inflammation, the CRP/albumin ratio, which may have greater  
51  
52 287 specificity and sensitivity for inflammation associated with metabolic dysfunction. The  
53  
54 288 CRP/albumin ratio was first found to be useful in assessing cardiometabolic and

1  
2  
3 289 inflammatory status following ovariectomy surgery. [20] It was subsequently used to show  
4  
5 290 the influence of chronic subclinical inflammation on bone quality in women with PCOS. [21]  
6  
7 291 Although CRP is used to predict cardiovascular risk and is associated with metabolic  
8  
9 292 disorders associated with obesity and insulin resistance, [28-31] it has been criticized for  
10  
11 293 being too general and non-specific a marker for inflammation. [32]  
12  
13  
14 294 When compared to CRP alone, we found that the CRP/albumin ratio had an improved ROC  
15  
16 295 curve for predicting PCOS. Serum albumin, which is commonly measured to assess liver  
17  
18 296 function and malnutrition, is not widely considered as an analyte of interest for PCOS.  
19  
20 297 However, this study showed for the first time that albumin is markedly reduced in women  
21  
22 298 with PCOS relative to controls. This may, at least in part, be due to albumin being a negative  
23  
24 299 acute phase protein. [18] It is also possible that there is increased oxidation and glycation of  
25  
26 300 albumin in women with PCOS - which can impact the structure, function and metabolism of  
27  
28 301 the protein. [18] As one of the most abundant serum proteins, among albumin's many roles is  
29  
30 302 the transport of hormones. [19] Thus, reduced albumin levels can potentially contribute to  
31  
32 303 higher free androgens in women with PCOS and exacerbation of disease phenotype.  
33  
34  
35  
36 304 This analysis was limited by a lack of a more sensitive measure of visceral adiposity; the gold  
37  
38 305 standard being imaging with computed tomography (CT) or magnetic resonance imaging  
39  
40 306 (MRI). [33] Furthermore, the case-control design limited the ability to assess how  
41  
42 307 CRP/albumin performs in predicting health outcomes in women with PCOS. Prospective  
43  
44 308 studies are now needed to determine the use of CRP/albumin in predicting the progression of  
45  
46 309 disorders linked to chronic inflammation and metabolic dysfunction that women with PCOS  
47  
48 310 are at increased risk. These include not only cardiovascular disease and diabetes, but also  
49  
50 311 depression. [34-37] Importantly, CRP/albumin ratio may be particularly useful in assessing  
51  
52 312 the effectiveness of new interventions targeting inflammation in women with PCOS as a  
53  
54 313 novel approach to managing the condition and its long-term health consequences.  
55  
56  
57  
58  
59  
60

1  
2  
3 314 *Conclusion:* CRP/albumin ratio, a marker for inflammation related to metabolic dysfunction,  
4  
5 315 is a better predictor of PCOS than either androgen excess or insulin resistance. Inflammation  
6  
7 316 is known to be influenced by adiposity, but relative to controls, women with PCOS have  
8  
9 317 higher levels of CRP/albumin ratio irrespective of BMI. This supports the view that  
10  
11 318 inflammation may play a central role in the pathophysiology of PCOS.  
12

13  
14 319

#### 15 16 320 **Funding Statement**

17  
18 321 The analysis presented was supported by an operating grant provided by the Vancouver  
19  
20 322 Coastal Health Research Institute in support of Dr. Shirin Kalyan.

#### 21 22 323 **Data Sharing Statement**

23  
24 324 Due to subject confidentiality, the complete data cannot be made publicly available.  
25  
26 325 However, researchers who would like controlled access to the data are welcome to contact  
27  
28 326 Dr. Wassim Y. Almawi at: wassim.almawi@outlook.com.

#### 29 30 31 327 **Acknowledgements**

32  
33 328 The authors would like to thank all the women who participated in this research. Without  
34  
35 329 their support and time, this work would not be possible.

#### 36 37 330 **Competing Interests Statement**

38  
39 331 SK is Director of Scientific Innovation at Qu Biologics Inc., a clinical-stage biotechnology  
40  
41 332 company. All other authors have no conflict of interest to declare.

#### 42 43 44 333 **Author Contributions**

45  
46 334 SK designed the study, interpreted the data and wrote the first draft of the manuscript. AG  
47  
48 335 performed the statistical analysis and helped interpret the analysis. SS and WA collected all  
49  
50 336 the data, performed the biochemical analysis and managed the clinical operations of the  
51  
52 337 study. AJ assisted with literature review and manuscript preparation. All authors reviewed  
53  
54 338 and approved the final manuscript.  
55

56  
57 339



340 **References Cited**

- 341 1 Sirmans SM, Pate KA. Epidemiology, diagnosis, and management of polycystic ovary  
342 syndrome. *Clin Epidemiol* 2013;6:1-13 doi:10.2147/CLEP.S37559 [doi].
- 343 2 Azziz R, Woods KS, Reyna R, et al. The prevalence and features of the polycystic ovary  
344 syndrome in an unselected population. *J Clin Endocrinol Metab* 2004;89:2745-9  
345 doi:10.1210/jc.2003-032046.
- 346 3 Fauser BC, Tarlatzis BC, Rebar RW, et al. Consensus on women's health aspects of  
347 polycystic ovary syndrome (PCOS): the Amsterdam ESHRE/ASRM-Sponsored 3rd PCOS  
348 Consensus Workshop Group. *Fertil Steril* 2012;97:28,38.e25  
349 doi:10.1016/j.fertnstert.2011.09.024; 10.1016/j.fertnstert.2011.09.024.
- 350 4 Azziz R, Carmina E, Dewailly D, et al. The Androgen Excess and PCOS Society criteria  
351 for the polycystic ovary syndrome: the complete task force report. *Fertil Steril* 2009;91:456-  
352 88 doi:10.1016/j.fertnstert.2008.06.035; 10.1016/j.fertnstert.2008.06.035.
- 353 5 Azziz R. PCOS: a diagnostic challenge. *Reprod Biomed Online* 2004;8:644-8.
- 354 6 Legro RS, Kusanman AR, Dodson WC, et al. Prevalence and predictors of risk for type 2  
355 diabetes mellitus and impaired glucose tolerance in polycystic ovary syndrome: a  
356 prospective, controlled study in 254 affected women. *J Clin Endocrinol Metab* 1999;84:165-  
357 9.
- 358 7 Marciniak A, Nawrocka Rutkowska J, Brodowska A, et al. Cardiovascular system diseases  
359 in patients with polycystic ovary syndrome - the role of inflammation process in this  
360 pathology and possibility of early diagnosis and prevention. *Ann Agric Environ Med*  
361 2016;23:537-41 doi:10.5604/12321966.1226842 [doi].
- 362 8 Shorakae S, Teede H, de Courten B, et al. The Emerging Role of Chronic Low-Grade  
363 Inflammation in the Pathophysiology of Polycystic Ovary Syndrome. *Semin Reprod Med*  
364 2015;33:257-69 doi:10.1055/s-0035-1556568 [doi].
- 365 9 Ojeda-Ojeda M, Murri M, Insenser M, et al. Mediators of Low-Grade Chronic  
366 Inflammation in Polycystic Ovary Syndrome (PCOS). *Curr Pharm Des* 2013.
- 367 10 Duleba AJ, Dokras A. Is PCOS an inflammatory process?. *Fertil Steril* 2012;97:7-12  
368 doi:10.1016/j.fertnstert.2011.11.023 [doi].
- 369 11 Kelly CC, Lyall H, Petrie JR, et al. Low grade chronic inflammation in women with  
370 polycystic ovarian syndrome. *J Clin Endocrinol Metab* 2001;86:2453-5  
371 doi:10.1210/jcem.86.6.7580 [doi].
- 372 12 Pepys MB, Hirschfield GM. C-reactive protein: a critical update. *J Clin Invest*  
373 2003;111:1805-12 doi:10.1172/JCI18921 [doi].
- 374 13 Lau DC, Dhillon B, Yan H, et al. Adipokines: molecular links between obesity and  
375 atherosclerosis. *Am J Physiol Heart Circ Physiol* 2005;288:H2031-41 doi:10.1152/ajpheart.00105.2004 [pii].

- 1  
2  
3 376 14 Escobar-Morreale HF, Luque-Ramirez M, Gonzalez F. Circulating inflammatory markers  
4 377 in polycystic ovary syndrome: a systematic review and metaanalysis. *Fertil Steril*  
5 378 2011;95:1048,58.e1-2 doi:10.1016/j.fertnstert.2010.11.036; 10.1016/j.fertnstert.2010.11.036.
- 6  
7 379 15 Samy N, Hashim M, Sayed M, et al. Clinical significance of inflammatory markers in  
8 380 polycystic ovary syndrome: their relationship to insulin resistance and body mass index. *Dis*  
9 381 *Markers* 2009;26:163-70 doi:10.3233/DMA-2009-0627 [doi].
- 10  
11 382 16 Hughan KS, Tfayli H, Warren-Ulanch JG, et al. Early Biomarkers of Subclinical  
12 383 Atherosclerosis in Obese Adolescent Girls with Polycystic Ovary Syndrome. *J Pediatr*  
13 384 2016;168:104,11.e1 doi:10.1016/j.jpeds.2015.09.082 [doi].
- 14  
15 385 17 Carvalho LM, Ferreira CN, Soter MO, et al. Microparticles: Inflammatory and  
16 386 haemostatic biomarkers in Polycystic Ovary Syndrome. *Mol Cell Endocrinol* 2017;443:155-  
17 387 62 doi:S0303-7207(17)30021-7 [pii].
- 18  
19  
20 388 18 Levitt DG, Levitt MD. Human serum albumin homeostasis: a new look at the roles of  
21 389 synthesis, catabolism, renal and gastrointestinal excretion, and the clinical value of serum  
22 390 albumin measurements. *Int J Gen Med* 2016;9:229-55 doi:10.2147/IJGM.S102819 [doi].
- 23  
24 391 19 Zeginiadou T, Koliass S, Kouretas D, et al. Nonlinear binding of sex steroids to albumin  
25 392 and sex hormone binding globulin. *Eur J Drug Metab Pharmacokinet* 1997;22:229-35.
- 26  
27  
28 393 20 Kalyan S, Hitchcock CL, Sirrs S, et al. Cardiovascular and metabolic effects of  
29 394 medroxyprogesterone acetate versus conjugated equine estrogen after premenopausal  
30 395 hysterectomy with bilateral ovariectomy. *Pharmacotherapy* 2010;30:442-52  
31 396 doi:10.1592/phco.30.5.442.
- 32  
33 397 21 Kalyan S, Patel MS, Kingwell E, et al. Competing Factors Link to Bone Health in  
34 398 Polycystic Ovary Syndrome: Chronic Low-Grade Inflammation Takes a Toll. *Sci Rep*  
35 399 2017;7:3432,017-03685-x doi:10.1038/s41598-017-03685-x [doi].
- 36  
37  
38 400 22 Chang RJ. The reproductive phenotype in polycystic ovary syndrome. *Nat Clin Pract*  
39 401 *Endocrinol Metab* 2007;3:688-95 doi:ncpendmet0637 [pii].
- 40  
41 402 23 Schmid J, Kirchengast S, Vytiska-Binstorfer E, et al. Infertility caused by PCOS--health-  
42 403 related quality of life among Austrian and Moslem immigrant women in Austria. *Hum*  
43 404 *Reprod* 2004;19:2251-7 doi:10.1093/humrep/deh432 [doi].
- 44  
45 405 24 The Rotterdam ESHRE/ASRM-Sponsored PCOS Consensus, Workshop Group. Revised  
46 406 2003 consensus on diagnostic criteria and long-term health risks related to polycystic ovary  
47 407 syndrome. *Fertil Steril* 2004;81:19-25.
- 48  
49 408 25 George D, Mallery P. SPSS for Windows Step by Step: A Simple Guide and Reference:  
50 409 Allyn & Bacon 2010.
- 51  
52  
53 410 26 Lihn AS, Pedersen SB, Richelsen B. Adiponectin: action, regulation and association to  
54 411 insulin sensitivity. *Obes Rev* 2005;6:13-21 doi:OBR159 [pii].
- 55  
56  
57  
58  
59

- 1  
2  
3 412 27 Dimitriadis GK, Kyrou I, Randeve HS. Polycystic Ovary Syndrome as a Proinflammatory  
4 413 State: The Role of Adipokines. *Curr Pharm Des* 2016;22:5535-46 doi:CPD-EPUB-77340  
5 414 [pii].  
6  
7 415 28 Cardoso CR, Leite NC, Salles GF. Prognostic Importance of C-Reactive Protein in High  
8 416 Cardiovascular Risk Patients With Type 2 Diabetes Mellitus: The Rio de Janeiro Type 2  
9 417 Diabetes Cohort Study. *J Am Heart Assoc* 2016;5:e004554 doi:e004554 [pii].  
10  
11 418 29 Chen TH, Gona P, Sutherland PA, et al. Long-term C-reactive protein variability and  
12 419 prediction of metabolic risk. *Am J Med* 2009;122:53-61 doi:10.1016/j.amjmed.2008.08.023  
13 420 [doi].  
14  
15 421 30 Rutter MK, Meigs JB, Sullivan LM, et al. C-reactive protein, the metabolic syndrome, and  
16 422 prediction of cardiovascular events in the Framingham Offspring Study. *Circulation*  
17 423 2004;110:380-5 doi:10.1161/01.CIR.0000136581.59584.0E [doi].  
18  
19  
20 424 31 Choi J, Joseph L, Pilote L. Obesity and C-reactive protein in various populations: a  
21 425 systematic review and meta-analysis. *Obes Rev* 2013;14:232-44 doi:10.1111/obr.12003 [doi].  
22  
23 426 32 Kraus VB, Jordan JM. Serum C-Reactive Protein (CRP), Target for Therapy or Trouble?.  
24 427 *Biomark Insights* 2007;1:77-80.  
25  
26 428 33 Shuster A, Patlas M, Pinthus JH, et al. The clinical importance of visceral adiposity: a  
27 429 critical review of methods for visceral adipose tissue analysis. *Br J Radiol* 2012;85:1-10  
28 430 doi:10.1259/bjr/38447238 [doi].  
29  
30  
31 431 34 Faugere M, Micoulaud-Franchi JA, Faget-Agius C, et al. Quality of life is associated with  
32 432 chronic inflammation in depression: A cross-sectional study. *J Affect Disord* 2017;227:494-7  
33 433 doi:S0165-0327(17)30792-9 [pii].  
34  
35 434 35 Chirinos DA, Murdock KW, LeRoy AS, et al. Depressive symptom profiles, cardio-  
36 435 metabolic risk and inflammation: Results from the MIDUS study. *Psychoneuroendocrinology*  
37 436 2017;82:17-25 doi:S0306-4530(16)30877-0 [pii].  
38  
39  
40 437 36 Barry JA, Kuczmierczyk AR, Hardiman PJ. Anxiety and depression in polycystic ovary  
41 438 syndrome: a systematic review and meta-analysis. *Hum Reprod* 2011;26:2442-51  
42 439 doi:10.1093/humrep/der197; 10.1093/humrep/der197.  
43  
44 440 37 Dokras A, Clifton S, Futterweit W, et al. Increased risk for abnormal depression scores in  
45 441 women with polycystic ovary syndrome: a systematic review and meta-analysis. *Obstet*  
46 442 *Gynecol* 2011;117:145-52 doi:10.1097/AOG.0b013e318202b0a4;  
47 443 10.1097/AOG.0b013e318202b0a4.  
48  
49  
50 444  
51 445

1  
2  
3 446 **Figure Legends**

4 447

5 448 **Figure 1.** Receiver Operating Characteristic (ROC) curve plotting the true positive rate

6  
7 449 against the false positive rate for CRP/Albumin (green line) and CRP (blue line) in

8  
9 450 differentiating women with and without PCOS. The area under the curve (AUC) for

10  
11 451 CRP/Albumin: 0.865, 95% CI: 0.824-0.905; for CRP: 0.820, 95% CI: 0.773-0.867.

12  
13  
14  
15 452 **Figure 2.** Linear regression analysis of adjusted CRP/albumin values by body mass index

16  
17 453 (BMI) in women with PCOS and controls.

18  
19  
20  
21 454

22  
23 455  
24  
25  
26  
27  
28  
29  
30  
31  
32  
33  
34  
35  
36  
37  
38  
39  
40  
41  
42  
43  
44  
45  
46  
47  
48  
49  
50  
51  
52  
53  
54  
55  
56  
57  
58  
59  
60

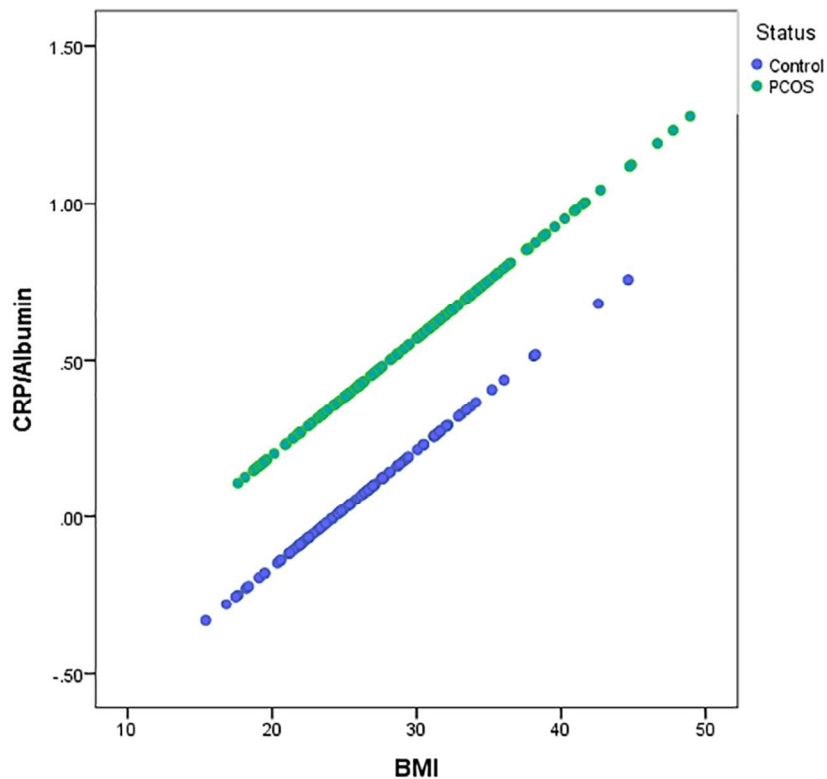

Figure 2. Linear regression analysis of adjusted CRP/albumin values by body mass index (BMI) in women with PCOS and controls. A univariate generalized linear model was computed investigating the relationship between CRP/albumin and BMI, adjusting for the variables found to associate with CRP/albumin (insulin, free testosterone, progesterone and adiponectin) plus age stratified by PCOS diagnosis.

101x81mm (300 x 300 DPI)

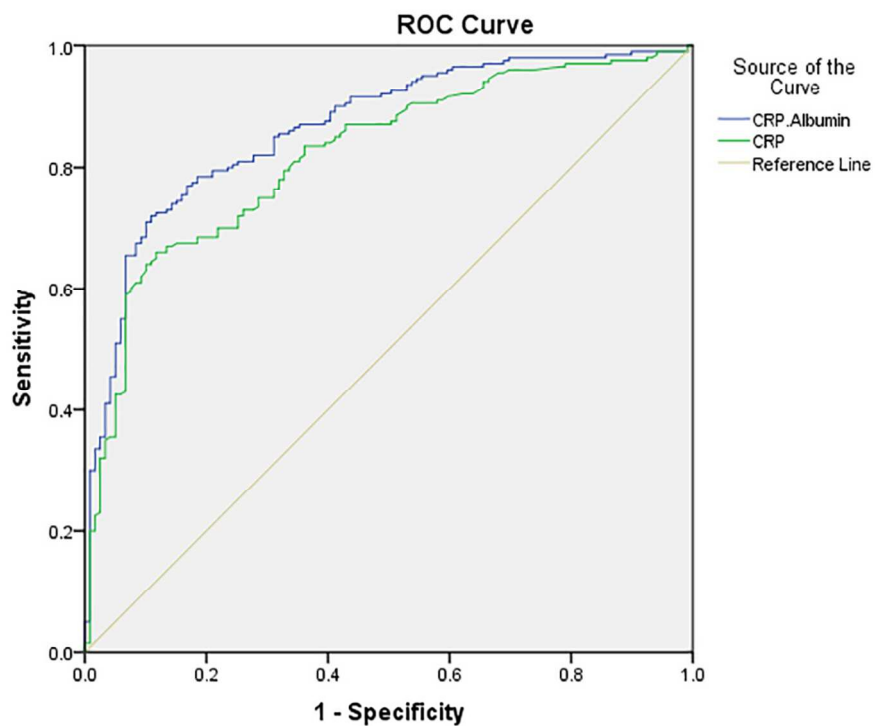

Diagonal segments are produced by ties.

33 Figure 1. Receiver Operating Characteristic (ROC) curve plotting the true positive rate against the false  
34 positive rate for CRP/Albumin (green line) and CRP (blue line) in differentiating women with and without  
35 PCOS. The area under the curve (AUC) for CRP/Albumin: 0.865, 95% CI: 0.824-0.905; for CRP: 0.820, 95%  
36 CI: 0.773-0.867.

101x81mm (300 x 300 DPI)

**STROBE Statement**

## Checklist of items that should be included in reports of observational studies

| Section/Topic                                                                                      | Item No | Recommendation                                                                                                                                                                             | Reported on Page No |
|----------------------------------------------------------------------------------------------------|---------|--------------------------------------------------------------------------------------------------------------------------------------------------------------------------------------------|---------------------|
| <b>Title and abstract</b>                                                                          | 1       | (a) Indicate the study's design with a commonly used term in the title or the abstract                                                                                                     | 1                   |
|                                                                                                    |         | (b) Provide in the abstract an informative and balanced summary of what was done and what was found                                                                                        | 2,3                 |
| <b>Introduction</b>                                                                                |         |                                                                                                                                                                                            |                     |
| Background/rationale                                                                               | 2       | Explain the scientific background and rationale for the investigation being reported                                                                                                       | 4-5                 |
| Objectives                                                                                         | 3       | State specific objectives, including any prespecified hypotheses                                                                                                                           | 5                   |
| <b>Methods</b>                                                                                     |         |                                                                                                                                                                                            |                     |
| Study design                                                                                       | 4       | Present key elements of study design early in the paper                                                                                                                                    | 5                   |
| Setting                                                                                            | 5       | Describe the setting, locations, and relevant dates, including periods of recruitment, exposure, follow-up, and data collection                                                            | 5-6                 |
| Participants                                                                                       | 6       | (a) <i>Cohort study</i> —Give the eligibility criteria, and the sources and methods of selection of participants. Describe methods of follow-up                                            | 5-6                 |
|                                                                                                    |         | <i>Case-control study</i> —Give the eligibility criteria, and the sources and methods of case ascertainment and control selection. Give the rationale for the choice of cases and controls |                     |
|                                                                                                    |         | <i>Cross-sectional study</i> —Give the eligibility criteria, and the sources and methods of selection of participants                                                                      |                     |
| Variables                                                                                          | 7       | (b) <i>Cohort study</i> —For matched studies, give matching criteria and number of exposed and unexposed                                                                                   | 5-7                 |
|                                                                                                    |         | <i>Case-control study</i> —For matched studies, give matching criteria and the number of controls per case                                                                                 |                     |
| Data sources/measurement                                                                           | 8*      | Clearly define all outcomes, exposures, predictors, potential confounders, and effect modifiers. Give diagnostic criteria, if applicable                                                   | 5-7                 |
| Bias                                                                                               | 9       | For each variable of interest, give sources of data and details of methods of assessment (measurement). Describe comparability of assessment methods if there is more than one group       | 6,7                 |
| Study size                                                                                         | 10      | Describe any efforts to address potential sources of bias                                                                                                                                  | 5,6                 |
| Quantitative variables                                                                             | 11      | Explain how the study size was arrived at                                                                                                                                                  | 5                   |
| Statistical methods                                                                                | 12      | Explain how quantitative variables were handled in the analyses. If applicable, describe which groupings were chosen and why                                                               | 7,8                 |
|                                                                                                    |         | (a) Describe all statistical methods, including those used to control for confounding                                                                                                      | 7,8                 |
|                                                                                                    |         | (b) Describe any methods used to examine subgroups and interactions                                                                                                                        | -                   |
|                                                                                                    |         | (c) Explain how missing data were addressed                                                                                                                                                | -                   |
|                                                                                                    |         | (d) <i>Cohort study</i> —If applicable, explain how loss to follow-up was addressed                                                                                                        | 5                   |
| <i>Case-control study</i> —If applicable, explain how matching of cases and controls was addressed |         |                                                                                                                                                                                            |                     |
|                                                                                                    |         | <i>Cross-sectional study</i> —If applicable, describe analytical methods taking account of sampling strategy                                                                               |                     |
|                                                                                                    |         | (e) Describe any sensitivity analyses                                                                                                                                                      | -                   |

| Section/Topic            | Item No | Recommendation                                                                                                                                                                                               | Reported on Page No  |
|--------------------------|---------|--------------------------------------------------------------------------------------------------------------------------------------------------------------------------------------------------------------|----------------------|
| <b>Results</b>           |         |                                                                                                                                                                                                              |                      |
| Participants             | 13*     | (a) Report numbers of individuals at each stage of study—eg numbers potentially eligible, examined for eligibility, confirmed eligible, included in the study, completing follow-up, and analysed            | 9                    |
|                          |         | (b) Give reasons for non-participation at each stage                                                                                                                                                         | -                    |
|                          |         | (c) Consider use of a flow diagram                                                                                                                                                                           | -                    |
| Descriptive data         | 14*     | (a) Give characteristics of study participants (eg demographic, clinical, social) and information on exposures and potential confounders                                                                     | Table 1              |
|                          |         | (b) Indicate number of participants with missing data for each variable of interest                                                                                                                          | Table 1              |
|                          |         | (c) <i>Cohort study</i> —Summarise follow-up time (eg, average and total amount)                                                                                                                             |                      |
| Outcome data             | 15*     | <i>Cohort study</i> —Report numbers of outcome events or summary measures over time                                                                                                                          |                      |
|                          |         | <i>Case-control study</i> —Report numbers in each exposure category, or summary measures of exposure                                                                                                         | 9, Table 1           |
|                          |         | <i>Cross-sectional study</i> —Report numbers of outcome events or summary measures                                                                                                                           |                      |
| Main results             | 16      | (a) Give unadjusted estimates and, if applicable, confounder-adjusted estimates and their precision (eg, 95% confidence interval). Make clear which confounders were adjusted for and why they were included | 9-11                 |
|                          |         | (b) Report category boundaries when continuous variables were categorized                                                                                                                                    | Table 2, 11          |
|                          |         | (c) If relevant, consider translating estimates of relative risk into absolute risk for a meaningful time period                                                                                             | -                    |
| Other analyses           | 17      | Report other analyses done—eg analyses of subgroups and interactions, and sensitivity analyses                                                                                                               | Figures 1-2, Table 2 |
| <b>Discussion</b>        |         |                                                                                                                                                                                                              |                      |
| Key results              | 18      | Summarise key results with reference to study objectives                                                                                                                                                     | 12-13                |
| Limitations              | 19      | Discuss limitations of the study, taking into account sources of potential bias or imprecision. Discuss both direction and magnitude of any potential bias                                                   | 13-14                |
| Interpretation           | 20      | Give a cautious overall interpretation of results considering objectives, limitations, multiplicity of analyses, results from similar studies, and other relevant evidence                                   | 14                   |
| Generalisability         | 21      | Discuss the generalisability (external validity) of the study results                                                                                                                                        | 13, 14               |
| <b>Other Information</b> |         |                                                                                                                                                                                                              |                      |
| Funding                  | 22      | Give the source of funding and the role of the funders for the present study and, if applicable, for the original study on which the present article is based                                                | 14                   |

\*Give information separately for cases and controls in case-control studies and, if applicable, for exposed and unexposed groups in cohort and cross-sectional studies.



**Note:** An Explanation and Elaboration article discusses each checklist item and gives methodological background and published examples of transparent reporting. The STROBE checklist is best used in conjunction with this article (freely available on the Web sites of PLoS Medicine at <http://www.plosmedicine.org/>, Annals of Internal Medicine at <http://www.annals.org/>, and Epidemiology at <http://www.epidem.com/>). Information on the STROBE Initiative is available at [www.strobe-statement.org](http://www.strobe-statement.org).

For peer review only

# BMJ Open

## Assessing C-reactive protein/albumin ratio as a new biomarker for Polycystic Ovary Syndrome: a case-control study of women from Bahraini medical clinics

|                                 |                                                                                                                                                                                                                                                            |
|---------------------------------|------------------------------------------------------------------------------------------------------------------------------------------------------------------------------------------------------------------------------------------------------------|
| Journal:                        | <i>BMJ Open</i>                                                                                                                                                                                                                                            |
| Manuscript ID                   | bmjopen-2018-021860.R2                                                                                                                                                                                                                                     |
| Article Type:                   | Research                                                                                                                                                                                                                                                   |
| Date Submitted by the Author:   | 13-Aug-2018                                                                                                                                                                                                                                                |
| Complete List of Authors:       | Kalyan, Shirin; University of British Columbia, Medicine; Goshtasebi, Azita; University of British Columbia, Medicine Sarray, Sameh; Arabian Gulf University Joannou, Angela; University of British Columbia, Medicine Almawi, Wassim; El-Manar University |
| <b>Primary Subject Heading</b>: | Obstetrics and gynaecology                                                                                                                                                                                                                                 |
| Secondary Subject Heading:      | Diabetes and endocrinology                                                                                                                                                                                                                                 |
| Keywords:                       | polycystic ovary syndrome, inflammation, C-reactive protein, albumin, pathophysiology                                                                                                                                                                      |
|                                 |                                                                                                                                                                                                                                                            |

SCHOLARONE™  
Manuscripts

1  
2  
3 **1 Assessing C-reactive protein/albumin ratio as a new biomarker for Polycystic Ovary**  
4  
5 **2 Syndrome: a case-control study of women from Bahraini medical clinics**  
6

7  
8 3  
9 4 Short title: CRP/Albumin as a biomarker of PCOS  
10 5  
11 6

12 7 Shirin Kalyan <sup>1\*</sup>, Azita Goshtesabi <sup>1</sup>, Sameh Sarray <sup>2,3</sup>, Angela Joannou <sup>1</sup>, Wassim Y.  
13 8 Almawi <sup>3</sup>  
14 9

15 10  
16 11 <sup>1</sup>CeMCOR, Division of Endocrinology, Department of Medicine, University of British  
17 12 Columbia, Vancouver, BC, Canada  
18 13

19 14 <sup>2</sup>Arabian Gulf University, Department of Medical Biochemistry, Manama Bahrain  
20 15

21 16 <sup>3</sup>Faculty of Sciences, El-Manar University, Tunis, Tunisia.  
22

23 17  
24 18  
25 19  
26 20 \*Corresponding author:  
27 21 Dr. Shirin Kalyan  
28 22

29 23 Rm 4139, Diamond Health Care Centre  
30 24 Division of Endocrinology  
31 25 Department of Medicine  
32 26 University of British Columbia  
33 27

34 28 Email: [shirin.kalyan@ubc.ca](mailto:shirin.kalyan@ubc.ca)  
35 29  
36 30  
37 31  
38 32

39 33 Keywords: polycystic ovary syndrome, inflammation, pathophysiology, C-reactive protein,  
40 34 albumin  
41 35

42 36  
43 37 Word count: 2409 (main article)  
44 38  
45 39  
46 40  
47 41  
48 42  
49 43  
50 44  
51 45  
52 46  
53 47  
54 48  
55 49  
56 50  
57 51  
58 52  
59 53  
60 54

1  
2  
3 36  
4 37 **Abstract**

5  
6 38 *Objective:* Polycystic ovary syndrome (PCOS) is an endocrine disorder affecting  
7  
8 39 approximately one in seven women who experience androgen excess, menstrual cycle  
9  
10 40 irregularities, frequent anovulation, and a tendency for central obesity and insulin resistance.  
11  
12 41 Chronic subclinical inflammation is now recognized as being common in the context of  
13  
14 42 PCOS, which led to the postulation that PCOS may fundamentally be an inflammatory  
15  
16 43 process. This study aimed to: 1) evaluate serum CRP/albumin ratio as a potential predictive  
17  
18 44 biomarker for PCOS; 2) compare the relationship between CRP/albumin and PCOS to  
19  
20 45 variables classically associated with the syndrome.  
21  
22

23 46 *Design:* Case-control study.  
24

25 47 *Setting:* Adult obstetrics/gynaecology, endocrinology and outpatient clinics; university  
26  
27 48 hospital in Bahrain.  
28

29 49 *Participants:* 200 premenopausal women with a diagnosis of PCOS, and 119 ethnically-  
30  
31 50 matched eumenorrheic premenopausal women.  
32  
33

34 51 *Main Outcome Measures:* CRP/albumin ratio, anthropometric measures, insulin resistance,  
35  
36 52 androgen excess.  
37

38 53 *Results:* Independent of body mass index (BMI), receiver operating characteristic (ROC)  
39  
40 54 curve for CRP/albumin ratio as a selective biomarker for PCOS was 0.865 (95% CI: 0.824–  
41  
42 55 0.905), which was more sensitive than CRP alone. Binary regression analysis showed that  
43  
44 56 CRP/albumin ratio outperformed classical correlates, free androgen index and insulin  
45  
46 57 resistance, in predicting PCOS for every BMI category.  
47  
48

49 58 *Conclusion:* CRP/albumin ratio, a marker for inflammation related to metabolic dysfunction,  
50  
51 59 was found to have a stronger association with PCOS than either androgen excess or insulin  
52  
53 60 resistance. Inflammation is known to be influenced by adiposity, but relative to controls,  
54  
55  
56  
57  
58  
59  
60

1  
2  
3 61 women with PCOS have higher levels of CRP/albumin irrespective of BMI. These findings  
4  
5 62 support the view that inflammation plays a central role in the pathophysiology of PCOS.  
6  
7 63  
8  
9 64  
10

## 11 65 **Article Summary**

### 12 66 *Strengths and limitations of this study*

- 13 67 • This analysis addressed previous limitations of studies, namely small sample sizes,  
14 68 heterogeneous populations, and confounding factors (such as BMI), that have  
15 69 attempted to show PCOS is an inflammatory process
- 16 70 • The relationship between inflammation and PCOS was assessed using CRP/albumin  
17 71 ratio, which may be a better marker for inflammation in the context of metabolic  
18 72 dysfunction
- 19 73 • Limitation: study used waist circumference as a substitute for visceral adiposity; gold  
20 74 standard is computed tomography (CT) or magnetic resonance imaging (MRI)  
21 75

## 76 **Introduction**

77 Polycystic ovary syndrome (PCOS) is the most common reproductive disorder, affecting 5 to  
78 15 % of premenopausal women worldwide, [1, 2] and the prevalence of PCOS appears to be  
79 increasing. [1] This rise may partly be attributed to improved diagnosis as well as to an  
80 increase in environmental factors that predispose to the development of this complex  
81 metabolic condition. PCOS is characterized by androgen excess, menstrual irregularities,  
82 ovulatory disturbances, and is often associated with central obesity and insulin resistance. [3-  
83 5] As such, women with PCOS are at an increased risk for a number of health issues,  
84 including infertility, cardiovascular disease and diabetes. [3, 6, 7]

85 Possibly related to the constellation of endocrine and metabolic dysfunction they experience,  
86 women with PCOS are also found to have greater chronic subclinical inflammation, [8-11]  
87 which is often clinically assessed by measuring serum levels of C-reactive protein (CRP).  
88 CRP is a liver-derived acute phase protein produced in response to IL-6 secreted from  
89 activated cells such as macrophages and adipocytes. [12, 13] A meta-analysis of 31 studies  
90 concluded that systemic CRP levels are 96% higher in women with PCOS compared to  
91 control women. [14] Collectively, these findings have given rise to the speculation that  
92 inflammation may play a pivotal role in the pathophysiology of PCOS. [8-10]

93 Elevated serum CRP levels are linked to several health risk factors experienced by women  
94 with PCOS, particularly insulin resistance and heightened risk of type 2 diabetes. [7, 15, 16]  
95 Chronic inflammation also contributes to endothelial dysfunction, exacerbating the  
96 development of atherosclerotic plaques, triggering the onset of cardiovascular disease (CVD).  
97 [17] As such inflammation has been associated with both CVD and coronary artery disease in  
98 women with PCOS. [10]

1  
2  
3 99 In contrast to CRP, albumin is a negative acute phase response protein produced by the liver.  
4  
5 100 Serum levels of albumin are reduced in individuals experiencing chronic inflammation. [18]  
6  
7 101 In addition to its role as a binding molecule for sex steroids, [19] albumin also provides the  
8  
9 102 majority of the total antioxidant capacity of normal plasma. [18] The ratio of serum CRP  
10  
11 103 levels over serum albumin (CRP/albumin) was found to be strongly associated with more  
12  
13 104 severe metabolic dysfunction in premenopausal women with induced alterations to their  
14  
15 105 ovarian hormone status. [20] CRP/albumin ratio was also found to be significantly higher in  
16  
17 106 premenopausal women with PCOS relative to controls, and adversely predicted their bone  
18  
19 107 quality. [21] Given the ability of CRP/albumin to simultaneously capture chronic  
20  
21 108 inflammation and metabolic dysfunction in premenopausal women, we hypothesized that  
22  
23 109 CRP/albumin ratio may serve as a strong predictor of PCOS in a cohort of similarly aged  
24  
25 110 women. This case-control study investigated CRP/albumin ratio along with classical markers,  
26  
27 111 androgen excess and insulin resistance, in their association with PCOS in 319 premenopausal  
28  
29 112 Bahraini Arab women.  
30  
31  
32

33 113

34  
35 114 **Methods**36  
37 115 *Patient and public involvement*

38  
39 116 The development of the research question and the study's setting was influenced by the wish  
40  
41 117 many women in Bahrain have to bear children. Infertility is a consequence of PCOS, [22] and  
42  
43 118 the combination of both can impact women's health-related quality of life. [23] Patients were  
44  
45 119 not involved in the design of the study or the recruitment. Study participants will not be re-  
46  
47 120 contacted by the study investigators; however, the results of this study will be disseminated to  
48  
49 121 the Bahraini community through press releases of the open access publication.  
50  
51

52  
53 122 *Study subjects*  
54  
55  
56  
57  
58  
59  
60

1  
2  
3 123 Women with PCOS (n = 200) were recruited from adult obstetrics/gynecology,  
4  
5 124 endocrinology and outpatient clinics in Manama, Bahrain. Women without PCOS (n = 119)  
6  
7 125 were ethnically-matched, eumenorrheic university employees and students, and healthy  
8  
9 126 volunteers representative of the Bahraini population. The sample size was based on the  
10  
11 127 ability to detect differences between cases and controls with 10% precision (two-tailed t-test  
12  
13 128 with  $\alpha=0.05$ ) and 80% power, taking into account the estimated prevalence of PCOS in  
14  
15 129 Bahrain of 7.5-8.0% (Bahraini Ministry of Health;  
16  
17 130 [www.moh.gov.bh/Content/Files/Publications/statistics/HS2015](http://www.moh.gov.bh/Content/Files/Publications/statistics/HS2015)) and Z-value for 95% CI  
18  
19 131 (confidence interval). Women serving as controls were examined in the follicular phase of  
20  
21 132 their menstrual cycle and had their testosterone levels were within range. A diagnosis of  
22  
23 133 PCOS was based on the 2003 Rotterdam Criteria, which requires two of the three following  
24  
25 134 criteria to be met: ultrasound evidence of polycystic ovarian morphology, anovulation, and  
26  
27 135 hyperandrogenism. [24] Exclusion criteria included hyperprolactinemia, non-classical adrenal  
28  
29 136 hyperplasia, androgen-producing tumors, 21-hydroxylase deficiency, Cushing's syndrome,  
30  
31 137 and active thyroid disease (overt, central and subclinical hypothyroidism and  
32  
33 138 hyperthyroidism). Additional exclusion criteria included extremes of body mass index (BMI;  
34  
35 139  $<18 \text{ kg/m}^2$  or  $>45 \text{ kg/m}^2$ ), recent/present illness, and treatment affecting carbohydrate  
36  
37 140 metabolism or hormonal levels, for three months or longer before inclusion the study.  
38  
39 141 Women using anti-hypertensive, oral contraceptive, anti-inflammatory, and lipid-lowering  
40  
41 142 drugs were also excluded. Demographic information, along with detailed personal and family  
42  
43 143 history of diabetes, hypertension, infertility, hypercholesterolemia, and ischemic heart disease  
44  
45 144 were obtained from all participants. This study was conducted in accord with the Helsinki II  
46  
47 145 Declaration guidelines, and all participants gave written informed consent to participate.  
48  
49 146 Study approval was obtained from the Bahraini Ministry of Health and Arabian Gulf  
50  
51  
52  
53  
54  
55  
56  
57  
58  
59  
60



1  
2  
3 147 University Research and Ethics Committees (IRB number: 35-PI-01/15) and the Clinical  
4  
5 148 Research Ethics Board of the University of British Columbia (H16-02101).  
6  
7 149  
8  
9 150 *Biochemical analysis*  
10  
11 151 Peripheral venous fasting blood samples were obtained between 7:00 and 9:00 am following  
12  
13 152 an overnight ( $> 12$  h) fast during the early follicular phase of the menstrual cycle (days  $2 \pm 5$ )  
14  
15 153 for control women, or women with PCOS who did not present with menstrual irregularities,  
16  
17 154 or any day for women with PCOS with menstrual irregularities. Serum samples were  
18  
19 155 analyzed for sex hormone binding globulin (SHBG) by sandwich ELISA (R&D Systems,  
20  
21 156 Minneapolis, MN); assay sensitivity was 0.01 nmol/ml, and inter-assay and intra-assay  
22  
23 157 precision (CV %) were 5.3% and 4.3%, respectively. Samples were tested in duplicates for  
24  
25 158 adiponectin levels (Cat. No. DRP300) by sandwich enzyme-linked immunosorbent assay  
26  
27 159 (R&D Systems); assay sensitivity was 0.891 ng/ml, and inter-assay and intra-assay precision  
28  
29 160 (CV%) were 6.5% and 3.5%, respectively.  
30  
31  
32  
33 161 Serum luteinizing hormone (LH), follicular stimulating hormone (FSH), thyroid stimulating  
34  
35 162 hormone (TSH), testosterone, glucose (ADVIA Centaur, Bayer Vital, Fernwald, Germany),  
36  
37 163 and insulin (IMMULITE 2000, DPC Biermann, Bad Nauheim, Germany), were measured by  
38  
39 164 automated chemiluminescence immunoassays. Free (FT) and bioactive (BT) testosterone and  
40  
41 165 free androgen index (FAI) were determined using Free & Bioavailable Testosterone  
42  
43 166 Calculator ([www.issam.ch/freetesto.htm](http://www.issam.ch/freetesto.htm)). Progesterone and estradiol serum levels were  
44  
45 167 quantitated by radioimmunoassay, with comparable CV% ( $< 5\%$ ), while DHEA-S levels  
46  
47 168 were measured by solid-phase competitive immunoassay (Immulite; Siemens); inter- and  
48  
49 169 intra-assay CV were 9.4 and 7.0%, respectively.  
50  
51  
52 170  
53  
54  
55  
56  
57  
58  
59  
60

1  
2  
3 171 Concentrations of serum albumin were analyzed by photospectrometry with albumin  
4  
5 172 bromocresol purple assay on a COBAS c701 Chemistry Analyzer (Roche Diagnostics, Dubai,  
6  
7 173 UAE). Insulin resistance (IR) was estimated by the homeostasis model assessment (HOMA-  
8  
9 174 IR), defined as fasting serum insulin (IU/mL)  $\times$  fasting plasma glucose  
10  
11 175 (mmol/L)/22.5. HOMA-IR values were characterized as Normal (insulin-sensitive) if  $<2.40$ ;  
12  
13 176 Borderline if between 2.40-3.50, and High (insulin-resistant) if  $> 3.50$ .

14  
15  
16  
17 177

18  
19 178 Measurement of plasma high sensitivity CRP levels was done by latex-enhanced  
20  
21 179 nephelometry on a BN II Nephelometer (Dade Behring, Milan, Italy). Samples were assayed  
22  
23 180 in duplicate in each analytical run; the lower limit of detection was 0.15 mg/L, and the assay  
24  
25 181 range was 0.175–11.0 mg/L (initial dilution). Serial serum dilutions were made in measuring  
26  
27 182 high CRP ( $>30$  mg/L) levels. Percentile CRP values were estimated for comparison  
28  
29 183 purposes.

### 30 31 32 33 184 *Statistical analysis*

34  
35 185 The *core outcome set* of variables included assessment of CRP/albumin as a predictor of  
36  
37 186 PCOS while controlling for relevant factors, such as BMI and age, and to subsequently  
38  
39 187 compare the strength of the relationship between CRP/albumin and PCOS with variables  
40  
41 188 known to strongly link to the syndrome, namely androgen excess and insulin resistance. The  
42  
43 189 Shapiro-Wilk test was used to evaluate the distribution of the variables, and many variables  
44  
45 190 for the PCOS cohort were flagged as being non-normally distributed. However, upon testing  
46  
47 191 for skewness, we found the values for asymmetry and kurtosis fell between -2 to +2 for all.  
48  
49 192 Thus, we used parametric tests, as suggested, [25] given the sample sizes were  $>30$ . We  
50  
51 193 reassessed the validity of our analysis by running the Mann–Whitney U test in addition to  
52  
53 194 student t test for variables we had detected as being non-normal and confirmed that the  
54  
55  
56  
57  
58  
59  
60

1  
2  
3 195 results were similar. Baseline characteristics were compared using the Mann-Whitney U test  
4  
5 196 and the independent samples t-test for the continuous variables, and the  $\chi^2$  test for categorical  
6  
7 197 variables. Numerical variables are presented as mean  $\pm$  standard deviation (SD). Because  
8  
9 198 distribution of CRP/albumin levels was skewed to the right, correlations between  
10  
11 199 CRP/albumin ratio and other continuous variables were assessed using Spearman's rho.  
12  
13 200 Univariate general linear models were applied to test independent associations between  
14  
15 201 CRP/albumin ratio and other independent variables.  
16  
17  
18 202 The optimal cut-off level for the CRP/albumin ratio was determined by a receiver operating  
19  
20 203 characteristic (ROC) curve analysis, and the areas under the curve (AUC) were measured and  
21  
22 204 compared to assess the power of a model to identify patients who experienced metabolic  
23  
24 205 disturbances. Cut-off values showing the greatest accuracy were determined using a  
25  
26 206 sensitivity/specificity versus criterion value plot. Quartiles (i.e. 0-25%, 26-50%, 51-75%, and  
27  
28 207 76-100%) of CRP and CRP/albumin ratio were calculated separately in PCOS and control  
29  
30 208 groups. Because the 25% quartile of CRP value in the PCOS cohort was similar to the  
31  
32 209 standard normal values of CRP, we used the 25% quartile of CRP and CRP/albumin ratio as  
33  
34 210 the cut-off point for both predictors.  
35  
36  
37  
38 211 Using the calculated cut-off values, regression analysis was performed to determine how well  
39  
40 212 each variable predicted PCOS. To fully explore the role of the CRP/albumin ratio as a  
41  
42 213 biomarker in the prediction of metabolic disturbances, CRP and CRP/albumin ratio were  
43  
44 214 additionally assessed as binary variables. Subjects were categorized into two groups based on  
45  
46 215 the cut-off values and their means (SD) for metabolic markers. Insulin resistance (HOMA-  
47  
48 216 IR), free testosterone, total adiponectin, BMI and TSH were compared between subjects with  
49  
50 217 normal values, and those who had higher than normal values. P-values  $<0.05$  were considered  
51  
52 218 as statistically significant. All statistical analyses were performed using the IBM SPSS  
53  
54 219 statistics software program version 22 (IBM, Armonk, NY).  
55  
56  
57  
58  
59  
60

220

221 **Results**222 *Study subjects*

223 The sociodemographic, anthropometric, clinical, and biochemical characteristics of the 200  
 224 women with PCOS and 119 controls women are summarized in **Table 1**. Relative to controls,  
 225 women with PCOS had fewer pregnancies and live births ( $p<0.001$ ), were more likely to  
 226 have insulin resistance ( $p<0.001$ ), and differed in education attainment with those with  
 227 PCOS, having a higher number of high school and post-secondary graduates ( $p=0.012$ ).

228 *Metabolic characteristics*

229 The proportion of women with a BMI greater than  $30 \text{ kg/m}^2$  were higher in the PCOS cohort  
 230 than controls ( $p<0.001$ ), but the waist-to-hip ratio was not significantly different (**Table 1**).  
 231 Serum levels of adiponectin, an adipocyte-associated protein that tends to be inversely linked  
 232 to visceral adiposity, [26] was markedly lower in women with PCOS compared to controls.  
 233 Fasting plasma glucose, cholesterol, HDL, LDL and triglyceride levels did not differ  
 234 significantly between women with and without PCOS. However, indices of insulin resistance  
 235 and insulin sensitivity (HOMA-IR and QUICKI) indicated that women with PCOS had  
 236 greater impaired regulation of insulin compared to controls (**Table 1**).

237 **Table 1: Demographic, clinical and hormonal characteristics of study population:**  
 238 **women with polycystic ovary syndrome (PCOS) and controls.**

239 Data are presented as means (standard deviation).

|  | All<br>(N=319) | PCOS<br>(N=200) | Controls<br>(N=119) | Mean<br>difference | 95 % CI of Mean<br>Difference | p<br>values |
|--|----------------|-----------------|---------------------|--------------------|-------------------------------|-------------|
|  |                |                 |                     |                    |                               |             |

|                                    |               |               |               |        | lower  | upper  |       |
|------------------------------------|---------------|---------------|---------------|--------|--------|--------|-------|
| Age (yrs)                          | 27.9 (6.4)    | 28.4 (5.9)    | 27.2 (7.2)    | 1.24   | -0.22  | 2.71   | 0.09  |
| BMI (kg/m <sup>2</sup> )           | 28 (5.9)      | 29 (6.3)      | 26.5 (5)      | 2.53   | 1.19   | 3.87   | 0.000 |
| Waist/hip ratio                    | 0.94 (0.09)   | 0.94 (0.09)   | 0.93 (0.09)   | 0.0067 | -0.017 | 0.031  | 0.58  |
| Menarche (yrs)                     | 12.5 (1.4)    | 12.5 (1.5)    | 12.4 (1.2)    | 0.12   | -0.21  | 0.45   | 0.47  |
| HOMA <sub>1</sub> IR               | 3.2 (0.18)    | 3.8 (0.26)    | 2.1 (0.2)     | 1.67   | 0.94   | 2.4    | 0.000 |
| QUICKI                             | 0.6 (0.006)   | 0.57 (0.008)  | 0.65 (.01)    | -0.078 | -0.10  | -0.05  | 0.000 |
| Total adiponectin (ng/L)           | 33.8 (1.4)    | 28.4 (1.3)    | 44.6 (2.9)    | -16.25 | -21    | -10    | 0.000 |
| Albumin (g/L)                      | 37.3 (0.46)   | 32.7 (0.46)   | 45 (0.35)     | -12.22 | -13.52 | -10.93 | 0.000 |
| CRP (mg/L)                         | 11.1 (1.1)    | 15.5 (1.6)    | 3.6 (0.85)    | 11.89  | 7.61   | 16.17  | 0.000 |
| CRP/Albumin ratio                  | 0.36 (0.04)   | 0.53 (0.06)   | 0.08 (0.02)   | 0.45   | 0.29   | 0.61   | 0.000 |
| SHBG (nmol/L)                      | 60.1 (1.5)    | 52.2 (1.4)    | 72 (2.8)      | -19.72 | -26.5  | -13.93 | 0.000 |
| DHEAS (nmol/L)                     | 6.2 (0.28)    | 6.2 (0.29)    | 6.3 (0.95)    | -0.18  | -0.174 | 1.36   | 0.81  |
| Total testosterone (nmol/L)        | 1.7 (0.06)    | 1.8 (0.07)    | 1.5 (0.1)     | 0.23   | -0.02  | 0.49   | 0.08  |
| Bioavailable testosterone (nmol/L) | 0.49 (0.02)   | 0.52 (0.03)   | 0.42 (0.03)   | 0.098  | 0.015  | 0.18   | 0.02  |
| Free Androgen Index                | 3.4 (0.16)    | 4 (0.22)      | 2.4 (0.16)    | 1.57   | 0.93   | 2.2    | 0.000 |
| Free testosterone                  | 0.025 (0.001) | 0.029 (0.001) | 0.017 (0.001) | 0.011  | 0.007  | 0.015  | 0.000 |

|       |  |  |  |  |  |  |  |
|-------|--|--|--|--|--|--|--|
| index |  |  |  |  |  |  |  |
|-------|--|--|--|--|--|--|--|

240 BMI: Body Mass Index, HOMA.IR: Homeostatic Model Assessment for Insulin Resistance,

241 QUICKI: Quantitative insulin sensitivity check index, CRP: C-reactive protein, SHBG: Sex

242 hormone binding hormone.

243 *Reproductive hormone characteristics*

244 There were no statistically significant differences in plasma levels of estradiol, progesterone,

245 total testosterone, prolactin, FSH, LH and DHES between women with and without PCOS.

246 Free testosterone was higher and SHBG lower in women with PCOS (**Table 1**).

247 *C-reactive protein (CRP)/albumin ratio as a predictor of polycystic ovary syndrome (PCOS)*

248 *stratified by body mass index (BMI)*

249 Women with PCOS had markedly higher levels of CRP and lower levels of serum albumin

250 relative to controls ( $p < 0.001$ ; **Table 1**). ROC curve analysis showed that the CRP/albumin

251 ratio had greater discriminatory power to differentiate between women with PCOS and

252 controls (AUC: 0.865, 95% CI: 0.824-0.905) compared to CRP alone (AUC: 0.820, 95% CI:

253 0.773-0.867); **Figure 1**. This greater efficacy of CRP/albumin ratio to discriminate between

254 cases and controls was also evident when taking into account the presence of insulin

255 resistance at every measure of sensitivity; for a sensitivity level of 75%, CRP/albumin ratio

256 had a specificity of 85% compared to 69% for CRP alone.

257 Spearman correlation analysis between CRP/albumin ratios and clinical and biochemical

258 markers was subsequently performed. Variables found to be univariately linked to

259 CRP/albumin values were included in a general linear model testing the relationship amongst

260 PCOS diagnosis, BMI, and CRP/albumin levels. The model revealed that for any given BMI

261 value, women with PCOS have markedly elevated CRP/albumin levels ( $p < 0.001$ , **Figure 2**).

262 Variables that are known to strongly associate with PCOS, namely free androgen index and  
 263 insulin resistance, were compared to CRP/albumin ratio as predictors of PCOS in a binary  
 264 regression analysis stratified by three BMI categories:  $<25 \text{ kg/m}^2$  [normal],  $25 - 30 \text{ kg/m}^2$   
 265 [overweight],  $>30 \text{ kg/m}^2$  [obese]); **Table 2.** A CRP/albumin ratio of  $\geq 0.097$  outperformed  
 266 both insulin resistance and free androgen index in predicting PCOS for every BMI category  
 267 (**Table 2**).

268

269 **Table 2: Summary of binary Regression Analysis for Variables Predicting PCOS with**  
 270 **the Odds Ratio of each risk factor adjusted for other variables in the model**

271

|                                  | Odds Ratio (95% Confidence Interval) |                           |                          |
|----------------------------------|--------------------------------------|---------------------------|--------------------------|
|                                  | BMI < 25<br>(normal)                 | BMI 25-30<br>(overweight) | BMI $\geq$ 30<br>(obese) |
| CRP/Albumin Ratio <sup>1</sup>   |                                      |                           |                          |
| < 0.097                          | 1                                    | 1                         | 1                        |
| $\geq 0.097$                     | 11.21 (3.28-39.75)                   | 19.32 (5.07-72.17)        | 34.5 (7.75-153.52)       |
| Insulin Resistance <sup>2</sup>  |                                      |                           |                          |
| No                               | 1                                    | 1                         | 1                        |
| Borderline                       | 3.34 (0.645-17.33)                   | 5.58 (0.907-34.41)        | 3.13 (0.53-18.48)        |
| Yes                              | 9.21 (1.63-51.93)                    | 8.81 (1.75-44.31)         | 17.94 (1.81-177.61)      |
| Free Androgen Index <sup>3</sup> |                                      |                           |                          |
| <3.95                            | 1                                    | 1                         | 1                        |
| $\geq 3.95$                      | 2.28 (.536-9.75)                     | 0.86 (.22-3.35)           | 3.79 (0.59-24.42)        |

272

273 <sup>1</sup>Cut-off values were derived from the sensitivity and specificity analysis of the receiver  
 274 operating characteristic curve

275 <sup>2</sup>Categories of insulin resistance based on normal values used for HOMA-IR

1  
2  
3 276 <sup>3</sup>Cut-off values from normal laboratory reference ranges for free androgen index  
4  
5 277

6  
7 278 **Discussion**  
8

9 279 This study demonstrated that CRP/albumin ratio is a stronger correlate of PCOS than both  
10  
11 280 free androgens and insulin resistance in 319 ethnically-matched premenopausal women, and  
12  
13 281 this relationship was independent of BMI. Despite being the most common reproductive  
14  
15 282 disorder to affect women, the etiology of PCOS has remained elusive to date. In the absence  
16  
17 283 of a definitive cure, treatment has focused on symptom management, and a goal to prevent  
18  
19 284 the progression of serious health conditions, such as type 2 diabetes and CVD, for which  
20  
21 285 women with PCOS are at heightened risk. Chronic low-grade inflammation has emerged as a  
22  
23 286 common underlying state in women with PCOS, and a likely direct contributor to insulin  
24  
25 287 resistance and heart disease risk. This has raised the question whether PCOS is fundamentally  
26  
27 288 an inflammatory condition. [8, 10, 27]  
28  
29

30  
31 289 Small sample sizes, heterogeneous populations, and an inability to correct for confounding  
32  
33 290 factors, such as BMI and use of oral contraceptives, both of which influence inflammatory  
34  
35 291 markers such as CRP, [21] has in part hampered efforts in assigning inflammation as truly a  
36  
37 292 defining feature of PCOS. This current analysis has overcome some of the main issues in  
38  
39 293 assessing the independent relationship between PCOS and chronic low-grade inflammation.  
40  
41 294 This was accomplished by accounting for many of the confounding variables and by using a  
42  
43 295 more refined marker for inflammation, the CRP/albumin ratio, which may have greater  
44  
45 296 specificity and sensitivity for inflammation associated with metabolic dysfunction. The  
46  
47 297 CRP/albumin ratio was first found to be useful in assessing cardiometabolic and  
48  
49 298 inflammatory status following ovariectomy surgery. [20] It was subsequently used to show  
50  
51 299 the influence of chronic subclinical inflammation on bone quality in women with PCOS. [21]  
52  
53 300 Although CRP is used to predict cardiovascular risk and is associated with metabolic  
54  
55  
56  
57  
58  
59



1  
2  
3 301 disorders associated with obesity and insulin resistance, [28-31] it has been criticized for  
4  
5 302 being too general and non-specific a marker for inflammation. [32]  
6  
7  
8 303 When compared to CRP alone, we found that the CRP/albumin ratio has an improved ROC  
9  
10 304 curve for predicting PCOS. Serum albumin, which is commonly measured to assess liver  
11  
12 305 function and malnutrition, is not widely considered as an analyte of interest for PCOS.  
13  
14 306 However, this study showed for the first time that albumin is markedly reduced in women  
15  
16 307 with PCOS relative to controls. This may, at least in part, be due to albumin being a negative  
17  
18 308 acute phase protein. [18] It is also possible that there is increased oxidation and glycation of  
19  
20 309 albumin in women with PCOS, which can impact the structure, function and metabolism of  
21  
22 310 the protein. [18] Albumin is one of the most abundant serum proteins, and among its many  
23  
24 311 roles is the transport of hormones. [19] Thus, reduced albumin levels can potentially  
25  
26 312 contribute to higher free androgens in women with PCOS and exacerbation of disease  
27  
28 313 phenotype.  
29  
30  
31  
32 314 This analysis was limited by a lack of a more sensitive measure of visceral adiposity; the gold  
33  
34 315 standard is imaging with computed tomography (CT) or magnetic resonance imaging (MRI).  
35  
36 316 [33] Furthermore, the case-control design limited the ability to assess how CRP/albumin  
37  
38 317 performs in predicting health outcomes in women with PCOS. Prospective studies are now  
39  
40 318 needed to determine the use of CRP/albumin in predicting the progression of disorders linked  
41  
42 319 to chronic inflammation and metabolic dysfunction that women with PCOS are at increased  
43  
44 320 risk. These include not only cardiovascular disease and diabetes, but also depression. [34-37]  
45  
46 321 Importantly, CRP/albumin ratio may be particularly useful in assessing the effectiveness of  
47  
48 322 new interventions targeting inflammation in women with PCOS as a novel approach to  
49  
50 323 managing the condition and its long-term health consequences.  
51  
52  
53  
54  
55  
56  
57  
58  
59  
60

1  
2  
3 324 *Conclusion:* CRP/albumin ratio, a marker for inflammation related to metabolic dysfunction,  
4  
5 325 was found to have a stronger association with PCOS than either androgen excess or insulin  
6  
7 326 resistance. Inflammation is known to be influenced by adiposity, but relative to controls,  
8  
9 327 women with PCOS have higher levels of CRP/albumin ratio irrespective of BMI. This  
10  
11 328 supports the view that inflammation may play a central role in the pathophysiology of PCOS.  
12  
13  
14 329

### 15 16 330 **Funding Statement**

17  
18 331 The analysis presented was supported by an operating grant provided by the Vancouver  
19  
20 332 Coastal Health Research Institute in support of Dr. Shirin Kalyan.

### 21 22 333 **Data Sharing Statement**

23  
24 334 Due to subject confidentiality, the complete data cannot be made publicly available.  
25  
26 335 However, researchers who would like controlled access to the data are welcome to contact  
27  
28 336 Dr. Wassim Y. Almawi at: wassim.almawi@outlook.com.

### 29 30 31 337 **Acknowledgements**

32  
33 338 The authors would like to thank all the women who participated in this research. Without  
34  
35 339 their support and time, this work would not be possible.

### 36 37 340 **Competing Interests Statement**

38  
39 341 SK is Director of Scientific Innovation at Qu Biologics Inc., a clinical-stage biotechnology  
40  
41 342 company. All other authors have no conflict of interest to declare.

### 42 43 44 343 **Author Contributions**

45  
46 344 SK designed the study, interpreted the data and wrote the first draft of the manuscript. AG  
47  
48 345 performed the statistical analysis and helped interpret the analysis. SS and WA collected all  
49  
50 346 the data, performed the biochemical analysis and managed the clinical operations of the  
51  
52 347 study. AJ assisted with literature review and manuscript preparation. All authors reviewed  
53  
54 348 and approved the final manuscript.  
55  
56 349

350

## References Cited

- 1 Sirmans SM, Pate KA. Epidemiology, diagnosis, and management of polycystic ovary syndrome. *Clin Epidemiol* 2013;6:1-13 doi:10.2147/CLEP.S37559 [doi].
- 2 Azziz R, Woods KS, Reyna R, et al. The prevalence and features of the polycystic ovary syndrome in an unselected population. *J Clin Endocrinol Metab* 2004;89:2745-9 doi:10.1210/jc.2003-032046.
- 3 Fauser BC, Tarlatzis BC, Rebar RW, et al. Consensus on women's health aspects of polycystic ovary syndrome (PCOS): the Amsterdam ESHRE/ASRM-Sponsored 3rd PCOS Consensus Workshop Group. *Fertil Steril* 2012;97:28,38.e25 doi:10.1016/j.fertnstert.2011.09.024; 10.1016/j.fertnstert.2011.09.024.
- 4 Azziz R, Carmina E, Dewailly D, et al. The Androgen Excess and PCOS Society criteria for the polycystic ovary syndrome: the complete task force report. *Fertil Steril* 2009;91:456-88 doi:10.1016/j.fertnstert.2008.06.035; 10.1016/j.fertnstert.2008.06.035.
- 5 Azziz R. PCOS: a diagnostic challenge. *Reprod Biomed Online* 2004;8:644-8.
- 6 Legro RS, Kusanman AR, Dodson WC, et al. Prevalence and predictors of risk for type 2 diabetes mellitus and impaired glucose tolerance in polycystic ovary syndrome: a prospective, controlled study in 254 affected women. *J Clin Endocrinol Metab* 1999;84:165-9.
- 7 Marciniak A, Nawrocka Rutkowska J, Brodowska A, et al. Cardiovascular system diseases in patients with polycystic ovary syndrome - the role of inflammation process in this pathology and possibility of early diagnosis and prevention. *Ann Agric Environ Med* 2016;23:537-41 doi:10.5604/12321966.1226842 [doi].
- 8 Shorakae S, Teede H, de Courten B, et al. The Emerging Role of Chronic Low-Grade Inflammation in the Pathophysiology of Polycystic Ovary Syndrome. *Semin Reprod Med* 2015;33:257-69 doi:10.1055/s-0035-1556568 [doi].
- 9 Ojeda-Ojeda M, Murri M, Insenser M, et al. Mediators of Low-Grade Chronic Inflammation in Polycystic Ovary Syndrome (PCOS). *Curr Pharm Des* 2013.
- 10 Duleba AJ, Dokras A. Is PCOS an inflammatory process?. *Fertil Steril* 2012;97:7-12 doi:10.1016/j.fertnstert.2011.11.023 [doi].
- 11 Kelly CC, Lyall H, Petrie JR, et al. Low grade chronic inflammation in women with polycystic ovarian syndrome. *J Clin Endocrinol Metab* 2001;86:2453-5 doi:10.1210/jcem.86.6.7580 [doi].
- 12 Pepys MB, Hirschfield GM. C-reactive protein: a critical update. *J Clin Invest* 2003;111:1805-12 doi:10.1172/JCI18921 [doi].
- 13 Lau DC, Dhillon B, Yan H, et al. Adipokines: molecular links between obesity and atherosclerosis. *Am J Physiol Heart Circ Physiol* 2005;288:H2031-41 doi:10.1152/ajpheart.00105.2004 [pii].

- 1  
2  
3 386 14 Escobar-Morreale HF, Luque-Ramirez M, Gonzalez F. Circulating inflammatory markers  
4 387 in polycystic ovary syndrome: a systematic review and metaanalysis. *Fertil Steril*  
5 388 2011;95:1048,58.e1-2 doi:10.1016/j.fertnstert.2010.11.036; 10.1016/j.fertnstert.2010.11.036.  
6  
7 389 15 Samy N, Hashim M, Sayed M, et al. Clinical significance of inflammatory markers in  
8 390 polycystic ovary syndrome: their relationship to insulin resistance and body mass index. *Dis*  
9 391 *Markers* 2009;26:163-70 doi:10.3233/DMA-2009-0627 [doi].  
10  
11 392 16 Hughan KS, Tfayli H, Warren-Ulanch JG, et al. Early Biomarkers of Subclinical  
12 393 Atherosclerosis in Obese Adolescent Girls with Polycystic Ovary Syndrome. *J Pediatr*  
13 394 2016;168:104,11.e1 doi:10.1016/j.jpeds.2015.09.082 [doi].  
14  
15 395 17 Carvalho LM, Ferreira CN, Soter MO, et al. Microparticles: Inflammatory and  
16 396 haemostatic biomarkers in Polycystic Ovary Syndrome. *Mol Cell Endocrinol* 2017;443:155-  
17 397 62 doi:S0303-7207(17)30021-7 [pii].  
18  
19 398 18 Levitt DG, Levitt MD. Human serum albumin homeostasis: a new look at the roles of  
20 399 synthesis, catabolism, renal and gastrointestinal excretion, and the clinical value of serum  
21 400 albumin measurements. *Int J Gen Med* 2016;9:229-55 doi:10.2147/IJGM.S102819 [doi].  
22  
23 401 19 Zeginiadou T, Koliass S, Kouretas D, et al. Nonlinear binding of sex steroids to albumin  
24 402 and sex hormone binding globulin. *Eur J Drug Metab Pharmacokinet* 1997;22:229-35.  
25  
26 403 20 Kalyan S, Hitchcock CL, Sirrs S, et al. Cardiovascular and metabolic effects of  
27 404 medroxyprogesterone acetate versus conjugated equine estrogen after premenopausal  
28 405 hysterectomy with bilateral ovariectomy. *Pharmacotherapy* 2010;30:442-52  
29 406 doi:10.1592/phco.30.5.442.  
30  
31 407 21 Kalyan S, Patel MS, Kingwell E, et al. Competing Factors Link to Bone Health in  
32 408 Polycystic Ovary Syndrome: Chronic Low-Grade Inflammation Takes a Toll. *Sci Rep*  
33 409 2017;7:3432,017-03685-x doi:10.1038/s41598-017-03685-x [doi].  
34  
35 410 22 Chang RJ. The reproductive phenotype in polycystic ovary syndrome. *Nat Clin Pract*  
36 411 *Endocrinol Metab* 2007;3:688-95 doi:ncpendmet0637 [pii].  
37  
38 412 23 Schmid J, Kirchengast S, Vytiska-Binstorfer E, et al. Infertility caused by PCOS--health-  
39 413 related quality of life among Austrian and Moslem immigrant women in Austria. *Hum*  
40 414 *Reprod* 2004;19:2251-7 doi:10.1093/humrep/deh432 [doi].  
41  
42 415 24 The Rotterdam ESHRE/ASRM-Sponsored PCOS Consensus, Workshop Group. Revised  
43 416 2003 consensus on diagnostic criteria and long-term health risks related to polycystic ovary  
44 417 syndrome. *Fertil Steril* 2004;81:19-25.  
45  
46 418 25 George D, Mallery P. SPSS for Windows Step by Step: A Simple Guide and Reference:  
47 419 Allyn & Bacon 2010.  
48  
49 420 26 Lihn AS, Pedersen SB, Richelsen B. Adiponectin: action, regulation and association to  
50 421 insulin sensitivity. *Obes Rev* 2005;6:13-21 doi:OBR159 [pii].  
51  
52  
53  
54  
55  
56  
57  
58  
59  
60

- 1  
2  
3 422 27 Dimitriadis GK, Kyrou I, Randeva HS. Polycystic Ovary Syndrome as a Proinflammatory  
4 423 State: The Role of Adipokines. *Curr Pharm Des* 2016;22:5535-46 doi:CPD-EPUB-77340  
5 424 [pii].  
6  
7 425 28 Cardoso CR, Leite NC, Salles GF. Prognostic Importance of C-Reactive Protein in High  
8 426 Cardiovascular Risk Patients With Type 2 Diabetes Mellitus: The Rio de Janeiro Type 2  
9 427 Diabetes Cohort Study. *J Am Heart Assoc* 2016;5:e004554 doi:e004554 [pii].  
10  
11 428 29 Chen TH, Gona P, Sutherland PA, et al. Long-term C-reactive protein variability and  
12 429 prediction of metabolic risk. *Am J Med* 2009;122:53-61 doi:10.1016/j.amjmed.2008.08.023  
13 430 [doi].  
14  
15 431 30 Rutter MK, Meigs JB, Sullivan LM, et al. C-reactive protein, the metabolic syndrome, and  
16 432 prediction of cardiovascular events in the Framingham Offspring Study. *Circulation*  
17 433 2004;110:380-5 doi:10.1161/01.CIR.0000136581.59584.0E [doi].  
18  
19  
20 434 31 Choi J, Joseph L, Pilote L. Obesity and C-reactive protein in various populations: a  
21 435 systematic review and meta-analysis. *Obes Rev* 2013;14:232-44 doi:10.1111/obr.12003 [doi].  
22  
23 436 32 Kraus VB, Jordan JM. Serum C-Reactive Protein (CRP), Target for Therapy or Trouble?.  
24 437 *Biomark Insights* 2007;1:77-80.  
25  
26 438 33 Shuster A, Patlas M, Pinthus JH, et al. The clinical importance of visceral adiposity: a  
27 439 critical review of methods for visceral adipose tissue analysis. *Br J Radiol* 2012;85:1-10  
28 440 doi:10.1259/bjr/38447238 [doi].  
29  
30  
31 441 34 Faugere M, Micoulaud-Franchi JA, Faget-Agius C, et al. Quality of life is associated with  
32 442 chronic inflammation in depression: A cross-sectional study. *J Affect Disord* 2017;227:494-7  
33 443 doi:S0165-0327(17)30792-9 [pii].  
34  
35 444 35 Chirinos DA, Murdock KW, LeRoy AS, et al. Depressive symptom profiles, cardio-  
36 445 metabolic risk and inflammation: Results from the MIDUS study. *Psychoneuroendocrinology*  
37 446 2017;82:17-25 doi:S0306-4530(16)30877-0 [pii].  
38  
39  
40 447 36 Barry JA, Kuczmierczyk AR, Hardiman PJ. Anxiety and depression in polycystic ovary  
41 448 syndrome: a systematic review and meta-analysis. *Hum Reprod* 2011;26:2442-51  
42 449 doi:10.1093/humrep/der197; 10.1093/humrep/der197.  
43  
44 450 37 Dokras A, Clifton S, Futterweit W, et al. Increased risk for abnormal depression scores in  
45 451 women with polycystic ovary syndrome: a systematic review and meta-analysis. *Obstet*  
46 452 *Gynecol* 2011;117:145-52 doi:10.1097/AOG.0b013e318202b0a4;  
47 453 10.1097/AOG.0b013e318202b0a4.  
48  
49  
50 454  
51 455

1  
2  
3 456 **Figure Legends**

4 457

5 458 **Figure 1.** Receiver Operating Characteristic (ROC) curve plotting the true positive rate

6  
7 459 against the false positive rate for CRP/Albumin (green line) and CRP (blue line) in

8  
9 460 differentiating women with and without PCOS. The area under the curve (AUC) for

10  
11 461 CRP/Albumin: 0.865, 95% CI: 0.824-0.905; for CRP: 0.820, 95% CI: 0.773-0.867.

12  
13  
14  
15 462 **Figure 2.** Linear regression analysis of adjusted CRP/albumin values by body mass index

16  
17 463 (BMI) in women with PCOS and controls. A univariate generalized linear model was

18  
19 464 computed investigating the relationship between CRP/albumin and BMI, adjusting for the

20  
21 465 variables found to associate with CRP/albumin (insulin, free testosterone, progesterone and

22  
23 466 adiponectin) plus age stratified by PCOS diagnosis.

24  
25  
26  
27 467

28  
29 468

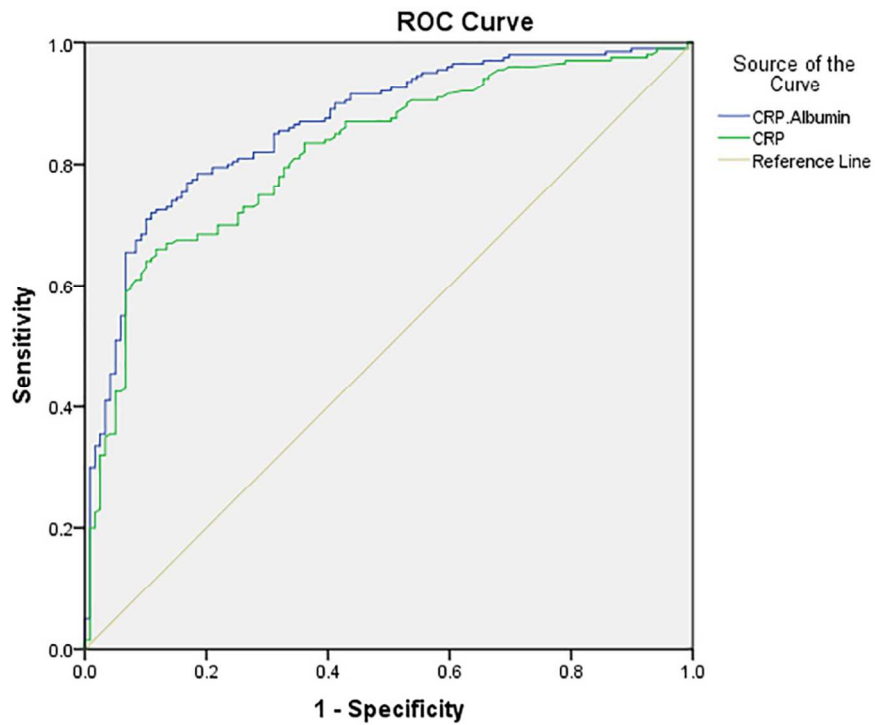

Diagonal segments are produced by ties.

33 Figure 1. Receiver Operating Characteristic (ROC) curve plotting the true positive rate against the false  
34 positive rate for CRP/Albumin (green line) and CRP (blue line) in differentiating women with and without  
35 PCOS. The area under the curve (AUC) for CRP/Albumin: 0.865, 95% CI: 0.824-0.905; for CRP: 0.820, 95%  
36 CI: 0.773-0.867.

101x81mm (300 x 300 DPI)

only



Figure 2. Linear regression analysis of adjusted CRP/albumin values by body mass index (BMI) in women with PCOS and controls. A univariate generalized linear model was computed investigating the relationship between CRP/albumin and BMI, adjusting for the variables found to associate with CRP/albumin (insulin, free testosterone, progesterone and adiponectin) plus age stratified by PCOS diagnosis.

101x81mm (300 x 300 DPI)



**STROBE Statement**

## Checklist of items that should be included in reports of observational studies

| Section/Topic                         | Item No | Recommendation                                                                                                                                                                             | Reported on Page No |
|---------------------------------------|---------|--------------------------------------------------------------------------------------------------------------------------------------------------------------------------------------------|---------------------|
| <b>Title and abstract</b>             | 1       | (a) Indicate the study's design with a commonly used term in the title or the abstract                                                                                                     | 1                   |
|                                       |         | (b) Provide in the abstract an informative and balanced summary of what was done and what was found                                                                                        | 2,3                 |
| <b>Introduction</b>                   |         |                                                                                                                                                                                            |                     |
| Background/rationale                  | 2       | Explain the scientific background and rationale for the investigation being reported                                                                                                       | 4-5                 |
| Objectives                            | 3       | State specific objectives, including any prespecified hypotheses                                                                                                                           | 5                   |
| <b>Methods</b>                        |         |                                                                                                                                                                                            |                     |
| Study design                          | 4       | Present key elements of study design early in the paper                                                                                                                                    | 5                   |
| Setting                               | 5       | Describe the setting, locations, and relevant dates, including periods of recruitment, exposure, follow-up, and data collection                                                            | 5-6                 |
| Participants                          | 6       | (a) <i>Cohort study</i> —Give the eligibility criteria, and the sources and methods of selection of participants. Describe methods of follow-up                                            | 5-6                 |
|                                       |         | <i>Case-control study</i> —Give the eligibility criteria, and the sources and methods of case ascertainment and control selection. Give the rationale for the choice of cases and controls |                     |
|                                       |         | <i>Cross-sectional study</i> —Give the eligibility criteria, and the sources and methods of selection of participants                                                                      |                     |
| Variables                             | 7       | (b) <i>Cohort study</i> —For matched studies, give matching criteria and number of exposed and unexposed                                                                                   | 5-7                 |
|                                       |         | <i>Case-control study</i> —For matched studies, give matching criteria and the number of controls per case                                                                                 |                     |
| Data sources/measurement              | 8*      | Clearly define all outcomes, exposures, predictors, potential confounders, and effect modifiers. Give diagnostic criteria, if applicable                                                   | 5-7                 |
| Bias                                  | 9       | For each variable of interest, give sources of data and details of methods of assessment (measurement). Describe comparability of assessment methods if there is more than one group       | 6,7                 |
| Bias                                  | 9       | Describe any efforts to address potential sources of bias                                                                                                                                  | 5,6                 |
| Study size                            | 10      | Explain how the study size was arrived at                                                                                                                                                  | 5                   |
| Quantitative variables                | 11      | Explain how quantitative variables were handled in the analyses. If applicable, describe which groupings were chosen and why                                                               | 7,8                 |
| Statistical methods                   | 12      | (a) Describe all statistical methods, including those used to control for confounding                                                                                                      | 7,8                 |
|                                       |         | (b) Describe any methods used to examine subgroups and interactions                                                                                                                        | -                   |
|                                       |         | (c) Explain how missing data were addressed                                                                                                                                                | -                   |
|                                       |         | (d) <i>Cohort study</i> —If applicable, explain how loss to follow-up was addressed                                                                                                        | 5                   |
|                                       |         | <i>Case-control study</i> —If applicable, explain how matching of cases and controls was addressed                                                                                         |                     |
| (e) Describe any sensitivity analyses | -       |                                                                                                                                                                                            |                     |
|                                       |         | <i>Cross-sectional study</i> —If applicable, describe analytical methods taking account of sampling strategy                                                                               |                     |

| Section/Topic            | Item No | Recommendation                                                                                                                                                                                               | Reported on Page No  |
|--------------------------|---------|--------------------------------------------------------------------------------------------------------------------------------------------------------------------------------------------------------------|----------------------|
| <b>Results</b>           |         |                                                                                                                                                                                                              |                      |
| Participants             | 13*     | (a) Report numbers of individuals at each stage of study—eg numbers potentially eligible, examined for eligibility, confirmed eligible, included in the study, completing follow-up, and analysed            | 9                    |
|                          |         | (b) Give reasons for non-participation at each stage                                                                                                                                                         | -                    |
|                          |         | (c) Consider use of a flow diagram                                                                                                                                                                           | -                    |
| Descriptive data         | 14*     | (a) Give characteristics of study participants (eg demographic, clinical, social) and information on exposures and potential confounders                                                                     | Table 1              |
|                          |         | (b) Indicate number of participants with missing data for each variable of interest                                                                                                                          | Table 1              |
|                          |         | (c) <i>Cohort study</i> —Summarise follow-up time (eg, average and total amount)                                                                                                                             |                      |
| Outcome data             | 15*     | <i>Cohort study</i> —Report numbers of outcome events or summary measures over time                                                                                                                          |                      |
|                          |         | <i>Case-control study</i> —Report numbers in each exposure category, or summary measures of exposure                                                                                                         | 9, Table 1           |
|                          |         | <i>Cross-sectional study</i> —Report numbers of outcome events or summary measures                                                                                                                           |                      |
| Main results             | 16      | (a) Give unadjusted estimates and, if applicable, confounder-adjusted estimates and their precision (eg, 95% confidence interval). Make clear which confounders were adjusted for and why they were included | 9-11                 |
|                          |         | (b) Report category boundaries when continuous variables were categorized                                                                                                                                    | Table 2, 11          |
|                          |         | (c) If relevant, consider translating estimates of relative risk into absolute risk for a meaningful time period                                                                                             | -                    |
| Other analyses           | 17      | Report other analyses done—eg analyses of subgroups and interactions, and sensitivity analyses                                                                                                               | Figures 1-2, Table 2 |
| <b>Discussion</b>        |         |                                                                                                                                                                                                              |                      |
| Key results              | 18      | Summarise key results with reference to study objectives                                                                                                                                                     | 12-13                |
| Limitations              | 19      | Discuss limitations of the study, taking into account sources of potential bias or imprecision. Discuss both direction and magnitude of any potential bias                                                   | 13-14                |
| Interpretation           | 20      | Give a cautious overall interpretation of results considering objectives, limitations, multiplicity of analyses, results from similar studies, and other relevant evidence                                   | 14                   |
| Generalisability         | 21      | Discuss the generalisability (external validity) of the study results                                                                                                                                        | 13, 14               |
| <b>Other Information</b> |         |                                                                                                                                                                                                              |                      |
| Funding                  | 22      | Give the source of funding and the role of the funders for the present study and, if applicable, for the original study on which the present article is based                                                | 14                   |

\*Give information separately for cases and controls in case-control studies and, if applicable, for exposed and unexposed groups in cohort and cross-sectional studies.

**Note:** An Explanation and Elaboration article discusses each checklist item and gives methodological background and published examples of transparent reporting. The STROBE checklist is best used in conjunction with this article (freely available on the Web sites of PLoS Medicine at <http://www.plosmedicine.org/>, Annals of Internal Medicine at <http://www.annals.org/>, and Epidemiology at <http://www.epidem.com/>). Information on the STROBE Initiative is available at [www.strobe-statement.org](http://www.strobe-statement.org).

3  
4  
5  
6  
7  
8  
9  
10  
11  
12  
13  
14  
15  
16  
17  
18  
19  
20  
21  
22  
23  
24  
25  
26  
27  
28  
29  
30  
31  
32  
33  
34  
35  
36  
37  
38  
39  
40  
41  
42  
43  
44  
45  
46  
47

For peer review only
